## 1 Neural Changes Underlying Rapid Fly Song Evolution

2  
3 Yun Ding<sup>1,\*</sup>, Joshua L. Lillvis<sup>1,\*</sup>, Jessica Cande<sup>1</sup>, Gordon J. Berman<sup>2</sup>, Benjamin J.  
4 Arthur<sup>1</sup>, Min Xu<sup>1</sup>, Barry J. Dickson<sup>1</sup>, David L. Stern<sup>1</sup>

5  
6 <sup>1</sup>Janelia Research Campus, Howard Hughes Medical Institute, 19700 Helix Drive,  
7 Ashburn, VA 20147, USA

8 <sup>2</sup>Department of Biology, Emory University, Atlanta, GA 30322. USA

9 \*These authors contributed equally to this work

### 10 11 **Abstract**

12 The neural basis for behavioural evolution is poorly understood. Functional comparisons  
13 of homologous neurons may reveal how neural circuitry contributes to behavioural  
14 evolution, but homologous neurons cannot be identified and manipulated in most taxa.  
15 Here, we compare the function of homologous courtship song neurons by exporting  
16 neurogenetic reagents that label identified neurons in *Drosophila melanogaster* to *D.*  
17 *yakuba*. We found a conserved role for a cluster of brain neurons that establish a  
18 persistent courtship state. In contrast, a descending neuron with conserved  
19 electrophysiological properties drives different song types in each species. Our results  
20 suggest that song evolved, in part, due to changes in the neural circuitry downstream of  
21 this descending neuron. This experimental approach can be generalized to other neural  
22 circuits and therefore provides an experimental framework for studying how the nervous  
23 system has evolved to generate behavioural diversity.

## 25 **Main text**

26 Closely related animal species exhibit diverse behaviours, indicating that the nervous  
27 system can evolve rapidly to generate new adaptive behaviours. Little is known about  
28 the neuronal mechanisms underlying behaviour evolution. The fundamental  
29 organization of brains and neural circuits are largely conserved between related animals,  
30 suggesting that new behaviours may evolve mostly through modifications of existing  
31 neural circuitry<sup>1</sup>. Functional comparisons of homologous neurons may therefore  
32 illustrate how neural circuits evolve to cause behavioural diversification<sup>2</sup>.

33 We have explored this problem in species closely related to *Drosophila*  
34 *melanogaster*, allowing study of neural function underlying diverse behaviours within a  
35 taxon with a well-defined phylogenetic history<sup>3</sup>. Recently, neurons underlying many  
36 behaviours have been identified in *D. melanogaster*<sup>4</sup>, mainly through progress in  
37 targeting genetic reagents to small subsets of cell types<sup>5</sup>. The amenability of other  
38 *Drosophila* species to genetic manipulation<sup>6</sup> provides a rare opportunity to perform  
39 functional comparisons of homologous circuits. In this study, we introduced  
40 neurogenetic reagents into non-*melanogaster Drosophila* species to study the function  
41 of homologous neurons in species that produce divergent courtship songs.

42

## 43 **Courtship song evolution in the *D. melanogaster* species subgroup**

44 *Drosophila* species display sophisticated courtship rituals often involving a male chasing  
45 the female, dancing around her, singing to her by vibrating one or both wings, waving  
46 their sometimes-spotted wings, licking the female, and other behaviours<sup>7</sup>. Here we  
47 focus on singing, which can be systematically quantified more easily than most  
48 courtship behaviours<sup>8</sup>. Females detect courtship song through vibrations of their  
49 antennal arista and they mate preferentially with males that sing intact<sup>9</sup> courtship song  
50 of their own species<sup>10</sup>. Courtship songs evolve rapidly, presumably as a result of  
51 female-choice sexual selection, and every species sings a unique song<sup>7</sup>.

52 *D. melanogaster* courtship song contains two basic elements: trains of pulses  
53 (pulse song) and continuous hums (sine song)<sup>10</sup>. Males of *D. yakuba* and *D. santomea*,  
54 however, do not sing sine song, but they produce two distinct modes of pulse song: thud

55 song and clack song<sup>11</sup>. Thud song is generated by unilateral wing vibration; while clack  
56 song is generated when males vibrate both wings behind them (Fig. 1a). To infer the  
57 evolutionary origins of these song types, we surveyed song in all *D. melanogaster*  
58 subgroup species by simultaneously recording acoustic signals and fly movements  
59 during courtship. As reported previously<sup>12,13</sup>, all of these species except *D. orena*  
60 produce a pulse-like song by unilateral wing vibration (Fig. 1b, Extended Data Fig. 1,  
61 and SI Movie 1), suggesting that unilateral pulse song was produced by the common  
62 ancestor of the group. We therefore reclassified thud song as pulse song, because it is  
63 similar to the ancestral unilateral pulse type. Clack song appears to be an evolutionarily  
64 new or elaborated song that evolved in the common ancestor of *D. yakuba* and *D.*  
65 *santomea*.

66 *D. yakuba* clack song has a higher carrier frequency (Fig. 1c) and is louder (Fig.  
67 1d) than pulse song<sup>11,14</sup>. Males sing clack song when both the male and female are  
68 moving faster than when males sing pulse song (Fig. 1e, f). Additionally, males sing  
69 pulse song mostly when they are located directly behind females, whilst they sing clack  
70 song across a wide range of distances and positions relative to females (Fig. 1g)<sup>11</sup>.  
71 Consistent with these observations, removing motion signals by providing males with a  
72 motionless decapitated female eliminated clack song but not pulse song (Fig. 1h, i).  
73 Thus, clack song is a high frequency, high amplitude song generated often during  
74 chasing. Pulse song in *D. yakuba*, by contrast, is quieter and generated when females  
75 slow down and allow males to follow them closely.

76

## 77 **Neurogenetic reagents from *D. melanogaster* label homologous neurons in *D.*** 78 ***yakuba***

79 Several neurons required for *D. melanogaster* song have been identified<sup>4</sup>. P1 is a  
80 cluster of approximately 20 male-specific neurons per brain hemisphere that integrate  
81 multiple sensory stimuli<sup>15-17</sup> and whose transient activity triggers a persistent courtship  
82 state<sup>18,19</sup>. Artificial activation of P1 neurons thus causes isolated males to produce many  
83 courtship behaviours, including song<sup>15,16</sup>. pIP10 is a single male-specific descending  
84 neuron per hemisphere that projects from the brain to the ventral nervous system (VNS)

85 where it arborizes within the wing neuropil. In *D. melanogaster*, pIP10 acts as a  
86 command-like pathway to drive pulse song<sup>15</sup>.

87 We first examined whether the homologous neurons of P1 and pIP10 could be  
88 identified in non-*melanogaster* fly species. Here, we considered three criteria to define  
89 neurons as homologs. Homologous neurons (1) should be anatomically similar, (2)  
90 should express genetic markers that reflect a similar developmental origin, and (3) may  
91 be required to produce similar behaviours.

92 We first tested a subset of *D. melanogaster* GAL4 reagents that express in P1  
93 and pIP10 neurons by integrating them into defined landing sites in *D. yakuba*<sup>6</sup>, and  
94 found that these GAL4 lines usually drove similar global expression patterns in both  
95 species (Extended Data Fig. 2). Since GAL4 reagents often drive expression in many  
96 unrelated neurons, we adopted the split-GAL4 strategy<sup>5</sup> to identify reagents that labeled  
97 targeted neurons more cleanly. Because both the P1 and pIP10 neurons express the  
98 male-specific isoform of the sex-determination transcription factor-encoding gene  
99 *fruitless (fru)*<sup>15</sup>, we also generated *fru* expressing reagents in *D. yakuba* by replacing the  
100 first exon of the male-specific *fru* isoform with GAL4, GAL4 activating domain (AD), and  
101 DNA-binding domain (DBD) via CRISPR/Cas9-mediated homology dependent repair  
102 (HDR)<sup>20</sup> (Extended Data Fig. 3a-c).

103 We screened two large *D. melanogaster* GAL4 driver line collections<sup>21,22</sup> and  
104 identified split-GAL4 combinations that labeled P1 (GMR071G01-AD  $\cap$  VT054805-DBD,  
105 VT059450-AD  $\cap$  VT054805-DBD) and pIP10 (VT040556-AD  $\cap$  VT043047-DBD) with  
106 little extraneous expression (Extended Data Fig. 3d, f). In *D. yakuba*, we tested five and  
107 seven split-GAL4 combinations for P1 and pIP10 respectively. In all cases, we identified  
108 neurons with projection patterns similar to the targeted neurons (Extended Data Fig. 3e,  
109 g). We used multiple relatively clean P1 and pIP10 reagents for further behavioural  
110 analysis. Among them, the P1 reagent R71G01-AD  $\cap$  R15A01-DBD and the pIP10  
111 reagent VT040346-AD  $\cap$  VT040556-DBD labeled male-specific neurons with the  
112 expected projection patterns almost exclusively. We show below that these labeled  
113 neurons also participate in producing courtship song in *D. yakuba*. Thus, based on  
114 criteria of anatomical similarity, expression of the same genetic markers (inferred

115 because the male-specific neurons are labeled with the same GAL4 lines), and  
116 behavioural phenotypes, the labeled *D. yakuba* neurons appear to represent homologs  
117 of P1 and pIP10. We exploited these reagents to explore the circuitry changes  
118 contributing to song evolution.

119

## 120 **P1 neurons drive a persistent courtship state in both *D. melanogaster* and *D.*** 121 ***yakuba***

122 We first tested whether P1 neurons have a conserved role in the two species. We  
123 expressed the red-shifted channel rhodopsin CsChrimson<sup>23</sup> in *D. melanogaster* and *D.*  
124 *yakuba* P1 neurons and exposed isolated males to red light. Consistent with previous  
125 reports<sup>15–19</sup>, we found that optogenetic activation of P1 neurons in *D. melanogaster*  
126 triggered multiple courtship behaviours, including both pulse and sine song (Extended  
127 Data Fig. 4a). Transient optogenetic activation of P1 neurons in *D. yakuba* caused  
128 isolated males to perform extended bouts of courtship behaviour, including abdomen  
129 quivering, wing rowing, wing scissoring, and song that consisted mainly of clacks (SI  
130 Movie 2 and Extended Data Fig. 4b). Since *D. yakuba* males produce pulse song mostly  
131 when they move close to females, and a moving object triggers P1-activated *D.*  
132 *melanogaster* males to court vigorously<sup>17,24</sup>, we provided optogenetically activated *D.*  
133 *yakuba* males with a recently anesthetized male *D. yakuba* and found that P1-activated  
134 males then produced large quantities of pulse song (Extended Data Fig. 4b). Thus, P1  
135 neurons have retained a conserved role in eliciting a persistent courtship state in both  
136 species. In addition, since activation of P1 neurons in *D. yakuba* males never caused  
137 production of sine song, the neural connections downstream of P1 likely evolved to  
138 cause loss of sine song.

139

## 140 **pIP10, the pulse song command neuron in *D. melanogaster*, is required for clack** 141 **but not pulse song in *D. yakuba***

142 To address the role of neurons that specifically drive courtship song, we examined  
143 pIP10 function in both species. pIP10 inhibition in *D. melanogaster* was previously  
144 shown to reduce wing extension during courtship<sup>15</sup>. We found that pIP10 inhibition in *D.*

145 *melanogaster* using our new split-GAL4 line caused almost complete elimination of  
146 pulse song and a small reduction in sine song produced during normal courtship (Fig.  
147 2a). In contrast, pIP10 inhibition in *D. yakuba* eliminated clack song consistently across  
148 different split-GAL4 drivers and neuronal inhibitors (Fig. 2b and Extended Data Fig. 5a-  
149 c). In addition, in some treatments, pIP10 inhibition resulted in a quantitative reduction  
150 of pulse song (Extended Data Fig. 5a, c). Therefore, pIP10 is essential for pulse song  
151 production in *D. melanogaster* and for clack song production in *D. yakuba*. pIP10 also  
152 contributes to quantitative levels of sine song in *D. melanogaster* and pulse song in *D.*  
153 *yakuba*. It appears that pIP10 has switched its role in *D. yakuba*, from a descending  
154 neuron required primarily for pulse song to a neuron required primarily for clack song.  
155 These evolutionary changes likely occurred in the common ancestor of *D. yakuba* and *D.*  
156 *santomea*, because inhibiting pIP10 activity in *D. santomea*, using a non-sparse GAL4  
157 line that labels pIP10, also blocked clack song but not pulse song during courtship  
158 (Extended Data Fig. 5d).

159

### 160 **Activation of pIP10 drives clack(-like) and pulse song in an intensity dependent** 161 **manner in both species**

162 To further explore the role of pIP10 in *D. yakuba*, we optogenetically activated pIP10  
163 neurons expressing CsChrimson. In both intact and decapitated males, pIP10 activation  
164 drove clack and pulse song in an intensity dependent manner (Fig. 2c, d, Extended  
165 Data Fig. 6a, b, and SI Movie 3); low levels of pIP10 activation drove only clack song,  
166 but higher levels drove both clack and pulse song (Extended Data Fig. 6c, d). Sine song  
167 was never elicited. Artificially activated song had an inter-clack interval within the wild-  
168 type range ( $\sim 115$ - $140$  ms)<sup>11,14</sup> at low levels of light intensity, but an abnormally short  
169 inter-clack interval at higher activation levels (Extended Data Fig. 6e). Thus, the lower  
170 activation levels may more closely mimic natural pIP10 activity levels than the higher  
171 activation levels in *D. yakuba*.

172 The observation that pIP10 can drive both clack and pulse song in *D. yakuba* led  
173 us to re-examine the effect of activating pIP10 in *D. melanogaster*. Throughout most of  
174 the light intensity range, pIP10 activation drove mainly pulse song with normal carrier

175 frequency (mode = ~200 Hz) (Extended Data Fig. 6f, g). Sine song was elicited rarely  
176 and the probability of sine song production increased with increasing light intensities  
177 (Extended Data Fig. 6h). Activation of pIP10 in *D. melanogaster* at very low light levels  
178 induced flies to produce a pulse song with a high carrier frequency (Extended Data Fig.  
179 6f, g). We performed simultaneous recording of acoustic signals and fly movements and  
180 found that most, if not all, of these high frequency pulses are generated by double-wing  
181 vibrations, mimicking the wing posture of clack song (SI Movie 4). Similarly, optogenetic  
182 activation of P1 in *D. melanogaster* induced both normal pulses and pulses resembling  
183 clack song in carrier frequency (Extended Data Fig. 4c, d) and wing posture (SI Movie  
184 5).

185 Overall, these observations are consistent with our inactivation experiments that  
186 revealed that pIP10 is required for clack song and natural levels of pulse song in *D.*  
187 *yakuba* and required for pulse song and natural levels of sine song in *D. melanogaster*.  
188 In addition, the induction of clack-like song by low levels of pIP10 stimulation in *D.*  
189 *melanogaster* suggests that the common ancestor of the *D. melanogaster* subgroup  
190 species possessed neural circuitry capable of producing clack song and that a circuit  
191 change in the common ancestor of *D. yakuba* and *D. santomea* allowed production of  
192 clack song more readily in these species. This evolutionary change was probably driven  
193 by female-choice sexual selection because *D. yakuba* males whose clack song is  
194 suppressed, by expression of Kir2.1 in pIP10 neurons, had significantly lower copulation  
195 success than control males (Extended Data Fig. 5e-g).

196

### 197 **Conserved physiological properties of pIP10 in *D. melanogaster* and *D. yakuba***

198 In both species, clack(-like) song is associated with low pIP10 activation levels.  
199 However, *D. melanogaster* produced clack-like song only in a narrow range of low  
200 activation levels, whereas *D. yakuba* produced clack song across a wide range of  
201 activation levels (Fig. 2e). Thus, the threshold between production of clack and pulse  
202 song has shifted between these species.

203 One hypothesis to explain these observations is that *D. melanogaster* pIP10 may  
204 exhibit higher excitability than *D. yakuba*, which would allow this neuron to more readily

205 reach an activity level sufficient to drive pulse song. We therefore expressed  
206 CsChrimson in pIP10 neurons and assayed the responses of these neurons to light  
207 stimuli via *ex vivo* whole-cell patch-clamp recordings. Both species displayed increasing  
208 spiking rates with increasing levels of light stimulation, but we observed no statistically  
209 significant species-differences in spiking pattern at any illumination level (Fig. 3a, b) and  
210 the neurons responded very similarly in the illumination range corresponding to that  
211 used in the behavioural experiments (yellow range in Fig. 3b). We also found no  
212 differences in other electrophysiological properties, including responses to depolarizing  
213 current, resting membrane potential, spike threshold, spike amplitude, and  
214 afterhyperpolarization amplitude (Fig. 3c-i). Thus, while it is possible that there are  
215 species differences in electrophysiological properties that could not be measured at the  
216 soma, the results suggest that pIP10 electrophysiological properties are conserved  
217 between these species and cannot account for the differences in song type elicited by  
218 pIP10 activation. We also found that the onset of song in response to light stimuli is  
219 similar in both species (Fig. 2e) and red light penetrates the cuticle of both species  
220 similarly (Extended Data Fig. 7a). Thus, there are no technical differences in the ability  
221 to activate these neurons *in vivo* that can explain the species behavioural differences  
222 exhibited in response to pIP10 activation. These results suggest that the circuitry  
223 downstream of pIP10 has evolved to produce differential responses to similar pIP10  
224 activity in these two species. However, we cannot exclude that species-specific  
225 differences in pIP10 neurotransmitter release, which we did not assay, may play a role  
226 in the behavioural differences elicited by similar levels of pIP10 activity.

227

### 228 **Quantitative differences in pIP10 anatomy**

229 One explanation for the species-specific difference in the song circuit response to pIP10  
230 activity could be that pIP10 may synapse more extensively onto a conserved set of  
231 downstream neurons in *D. melanogaster* than in *D. yakuba*, thus resulting in an  
232 increased sensitivity to pIP10 activity in *D. melanogaster*. We do not yet know the  
233 synaptic partners of pIP10, so we cannot be sure that pIP10 connects with the same  
234 neurons in each species, but we can use the existing reagents to examine pIP10



235 arborization patterns to estimate the total number of synaptic connections in different  
236 regions.

237         Although the gross pIP10 projection patterns were similar in the two species (Fig.  
238 4a, b, and SI Movie 6), we identified multiple species-specific differences (Fig. 4c-h). In  
239 the VNS, *D. yakuba* pIP10 displayed denser arbors than *D. melanogaster* pIP10 in  
240 several regions, particularly at the base of the mesothoracic triangle (red region 9 in Fig.  
241 4f, h) and at the posterior-most descending projections in the T3 neuropil (blue region  
242 12, magenta region 13 in Fig. 4f, h). Synaptotagmin staining, which marks pre-synaptic  
243 axons<sup>25</sup>, is observed in all of the pIP10 projections in the VNS<sup>15</sup> (Fig. 4a and SI Movie 7),  
244 suggesting that pIP10 is largely, if not exclusively, presynaptic in the VNS. While the  
245 song circuit is incompletely known, all identified VNS song neurons co-localize with the  
246 mesothoracic triangle<sup>9,15</sup>. Thus, pIP10 pre-synaptic arbors are less dense in the region  
247 containing the song circuitry in *D. melanogaster* compared to *D. yakuba*, which  
248 suggests that total synaptic output alone cannot explain the species-specific effects of  
249 pIP10 activation. It is possible that the relative strength of pIP10 connectivity to  
250 downstream neurons has shifted between species, perhaps biasing the song circuit  
251 toward production of clack song in *D. yakuba*. Testing this hypothesis will require  
252 synaptic-level reconstruction of the song circuit in both species.

253         In addition to the differences found in the VNS, we also identified differences in  
254 pIP10 brain arborization patterns (Fig. 4). For example, *D. melanogaster* pIP10 extends  
255 arbors into the posterior portion of the SEZ that are not observed in *D. yakuba* (magenta  
256 region 7 in Fig. 4e, g). Conversely, *D. yakuba* displayed dense arbors extending laterally  
257 into the SEZ, whereas *D. melanogaster* displayed few projections in the same area<sup>15</sup>  
258 (yellow region 4 in Fig. 4c-e, g). Synaptotagmin staining indicates that these SEZ arbors  
259 provide synaptic output in the brain (Fig. 4a and SI Movie 7). Thus, pIP10 anatomy has  
260 evolved in several ways in the brain as well, but further studies will be required to  
261 determine the evolutionary causes and functional consequences of these anatomical  
262 differences.

263

## 264 **Potential evolutionary antecedents of clack song in *D. melanogaster***

265 The observation that artificial activation of either P1 or pIP10 can, under certain  
266 conditions, elicit clack-like song in *D. melanogaster* males led us to re-examine the wild-  
267 type song of these species. Male *D. melanogaster* mainly produce low frequency (< 250  
268 Hz) pulses, but they also sometimes produce high frequency (> 250 Hz) pulses  
269 (Extended Data Fig. 8a)<sup>26</sup>. Lower frequency pulses (150-250Hz) are associated with  
270 large wing extension angles (~60°-90°) and higher frequency pulses (250-500Hz) are  
271 sometimes associated with smaller wing extension angles (~20°-40°) and sometimes  
272 with larger wing extension angles<sup>26</sup> (Extended Data Fig. 8d). We observed a negative  
273 correlation between wing angle and carrier frequency specifically for higher frequency  
274 pulses produced with shallow wing angles in *D. melanogaster* (Extended Data Fig. 8d)  
275 and this correlation is also observed in *D. simulans* and *D. mauritiana* (Extended Data  
276 Fig. 8e, f), suggesting that this reflects a conserved mechanism for generating high  
277 frequency pulses. We therefore searched more deeply for high frequency pulses  
278 generated by wings at acute angles and found, in ~1% of all pulse events, that *D.*  
279 *melanogaster* males generate short trains of high frequency pulses (mode = 298 Hz)  
280 without obvious extension of either wing (SI Movie 8). These song events are similar to  
281 the clack-like song elicited by P1 and pIP10 activation and suggest that the evolutionary  
282 antecedents of *D. yakuba* clack song can be observed rarely in other species. Thus, the  
283 evolution of abundant clack song in *D. yakuba* and *D. santomea* may reflect cooption of  
284 existing neural circuitry in the common ancestor of the *D. melanogaster* subgroup  
285 species through quantitative changes in VNS circuitry that increases the probability that  
286 pIP10 activity drives clack song.

287

## 288 **Discussion**

289 Our results reveal five novel findings about the neural basis for the evolution of  
290 *Drosophila* courtship song. First, P1 neurons have retained a conserved function in  
291 establishing a persistent courtship state in *D. melanogaster* and *D. yakuba*. Since P1  
292 activation results in species-specific songs, the sine song circuitry downstream of P1  
293 has evolved between these species. Second, pIP10, a command neuron driving pulse

294 song in *D. melanogaster* became largely dispensable for pulse song but essential for  
295 clack song in *D. yakuba*. Third, clack (-like) song and pulse song can be elicited by  
296 pIP10 activation in an intensity dependent manner in both species. This observation,  
297 together with our observation of rare *D. melanogaster* clack-like song, suggests that the  
298 common ancestor of these species possessed neural circuitry that could produce clack-  
299 like song. Fourth, differential responses to pIP10 activity, resulting in the production of  
300 mainly pulse song in *D. melanogaster* and clack song in *D. yakuba*, likely arose due to  
301 differences in neural circuitry downstream of pIP10. Finally, pIP10 neural anatomy has  
302 evolved both qualitatively and quantitatively, raising new questions about descending  
303 neuron evolution, structure and function.

304 It is curious that pIP10 drives mainly different songs in each species, when both  
305 species produce the apparently conserved pulse song. A similar observation has been  
306 reported in swim central pattern generator neurons of sea slugs, where homologous  
307 neurons play different roles in the production of homologous behaviours<sup>27</sup>. However, in  
308 both species pIP10 elicits primarily the louder song type in the context of males chasing  
309 females: pulse song in *D. melanogaster*<sup>28</sup> and clack song in *D. yakuba* (Fig. 1d-f). In  
310 both species, when females slow down and allow males to follow them closely, they  
311 produce a quieter song, sine song in *D. melanogaster*<sup>28</sup> and pulse song in *D. yakuba*  
312 (Fig. 1d-f). Thus, the song types driven by increasing levels of pIP10 activity correlate  
313 with similar behavioural contexts in the two species (Fig. 5). This suggests that pIP10  
314 receives similar inputs in both species that reflect information about the behavioural  
315 context and that downstream circuitry has changed so as to elicit divergent songs that  
316 are appropriate to the social context.

317 In both species, pIP10 activation drives different song types in an intensity  
318 dependent manner. These observations are consistent with findings that minor  
319 differences in the activity of descending pathways can drive different patterns of song  
320 circuit activity in insects<sup>29</sup>. The availability of a descending pathway that can access  
321 different song circuit activity through minor modifications may have facilitated the rapid  
322 evolution of courtship behaviours in response to female choice sexual selection. In  
323 theory, evolution of the excitability of pIP10 could have driven evolution of new song

324 types, but in this case, it has not. Instead, our data suggest that changes in the circuitry  
325 downstream of the descending inputs has evolved to generate the diverged patterns of  
326 courtship song in response to similar social cues.

327 *D. melanogaster* provides a powerful system for dissecting the neural circuitry  
328 underlying behaviour<sup>30</sup> and the genus *Drosophila* contains over 1,500 species  
329 displaying divergent adaptive behaviours<sup>31</sup>. Our functional comparative approach  
330 illustrates how we can leverage tools developed in *D. melanogaster* to study the  
331 homologous neural circuitry underlying the evolution of many behaviours across this  
332 genus<sup>32</sup>.

333

### 334 **Acknowledgements**

335

336 We thank Elizabeth Kim for extensive assistance in the laboratory, Kari Close,  
337 Christina Christoforou, and Gudrun Ihrke in the Janelia Project Technical Resources  
338 team for the assistance in dissection, histological preparation, and confocal imaging,  
339 Hideo Otsuna for assistance with brain registration and VVD Viewer, and Emily  
340 Robitschek and Jaime Cervantes for help in animal tracking using *ilastik*. Gerry Rubin  
341 and Heather Dionne for sharing plasmids, Artyom Kopp for providing the *D. oreana*  
342 strain, and Mala Murthy for helpful comments on the manuscript.

343

### 344 **Author Contributions**

345

346 Y.D., J.L.L., and D.L.S. designed the study and wrote the manuscript. Y.D.  
347 generated the *D. yakuba* and *D. santomea* genetic reagents with contributions from J.C.  
348 and D.L.S. J.L.L. and B.J.D. generated the *D. melanogaster* split-GAL4 lines. Y.D. and  
349 J.L.L. performed behavioural experiments. J.L.L. performed morphological quantification  
350 and electrophysiological experiments. B.A. built the behavioural rig and G.J.B.  
351 developed the *k*-means based song classification algorithm. M.X. performed fly  
352 husbandry and manual annotation of courtship. B.J.D. contributed to project discussion  
353 and manuscript editing.

354

## 355 References

- 356 1. Katz, P. S. & Harris-Warrick, R. M. The evolution of neuronal circuits underlying  
357 species-specific behavior. *Curr. Opin. Neurobiol.* **9**, 628–633 (1999).
- 358 2. Katz, P. S. Evolution and development of neural circuits in invertebrates. *Curr.*  
359 *Opin. Neurobiol.* **17**, 59–64 (2007).
- 360 3. Markow, T. A. & O’Grady, P. M. Evolutionary Genetics of Reproductive Behavior  
361 in *Drosophila*: Connecting the Dots. *Annu. Rev. Genet.* **39**, 263–291 (2005).
- 362 4. Auer, T. O. & Benton, R. Sexual circuitry in *Drosophila*. *Curr. Opin. Neurobiol.* **38**,  
363 18–26 (2016).
- 364 5. Pfeiffer, B. D. *et al.* Refinement of tools for targeted gene expression in  
365 *Drosophila*. *Genetics* **186**, 735–755 (2010).
- 366 6. Stern, D. L. *et al.* Genetic and Transgenic Reagents for *Drosophila simulans*, *D.*  
367 *mauritiana*, *D. yakuba*, *D. santomea*, and *D. virilis*. *G3 (Bethesda)*. **7**, 1339–1347  
368 (2017).
- 369 7. Spieth, H. T. Courtship Behavior in *Drosophila*. *Annu. Rev. Entomol.* **19**, 385–405  
370 (1974).
- 371 8. Arthur, B. J., Sunayama-Morita, T., Coen, P., Murthy, M. & Stern, D. L. Multi-  
372 channel acoustic recording and automated analysis of *Drosophila* courtship songs.  
373 *BMC Biol.* **11**, 11 (2013).
- 374 9. Shirangi, T. R., Stern, D. L. & Truman, J. W. Motor control of *Drosophila* courtship  
375 song. *Cell Rep.* **5**, 678–86 (2013).
- 376 10. Greenspan, R. J. & Ferveur, J.-F. Courtship in *Drosophila*. *Annu. Rev. Genet.* **34**,  
377 205–232 (2000).
- 378 11. Demetriades, M. C., Thackeray, J. R. & Kyriacou, C. P. Courtship song rhythms in  
379 *Drosophila yakuba*. *Anim. Behav.* **57**, 379–386 (1999).
- 380 12. Cobb, M., Burnet, B., Blizard, R. & Jallon, J.-M. Courtship in *Drosophila sechellia*:  
381 Its structure, functional aspects, and relationship to those of other members of  
382 the *Drosophila melanogaster* species subgroup. *J. Insect Behav.* **2**, 63–89 (1989).
- 383 13. Cowling, D. E. & Burnet, B. Courtship songs and genetic control of their acoustic  
384 characteristics in sibling species of the *Drosophila melanogaster* subgroup. *Anim.*  
385 *Behav.* **29**, 924–935 (1981).
- 386 14. Blyth, J. E., Lachaise, D. & Ritchie, M. G. Divergence in Multiple Courtship Song  
387 Traits between *Drosophila santomea* and *D. yakuba*. *Ethology* **114**, 728–736  
388 (2008).
- 389 15. von Philipsborn, A. C. *et al.* Neuronal Control of *Drosophila* Courtship Song.  
390 *Neuron* **69**, 509–522 (2011).
- 391 16. Kohatsu, S., Koganezawa, M. & Yamamoto, D. Female Contact Activates Male-  
392 Specific Interneurons that Trigger Stereotypic Courtship Behavior in *Drosophila*.  
393 *Neuron* **69**, 498–508 (2011).
- 394 17. Pan, Y., Meissner, G. W. & Baker, B. S. Joint control of *Drosophila* male courtship  
395 behavior by motion cues and activation of male-specific P1 neurons. *Proc. Natl.*  
396 *Acad. Sci. U. S. A.* **109**, 10065–70 (2012).

- 397 18. Bath, D. E. *et al.* FlyMAD: rapid thermogenetic control of neuronal activity in freely  
398 walking *Drosophila*. *Nat. Methods* **11**, 756–762 (2014).
- 399 19. Inagaki, H. K. *et al.* Optogenetic control of *Drosophila* using a red-shifted  
400 channelrhodopsin reveals experience-dependent influences on courtship. *Nat.*  
401 *Methods* **11**, 325–332 (2013).
- 402 20. Bassett, A. R. & Liu, J.-L. CRISPR/Cas9 and Genome Editing in *Drosophila*. *J.*  
403 *Genet. Genomics* **41**, 7–19 (2014).
- 404 21. Jenett, A. *et al.* A GAL4-Driver Line Resource for *Drosophila* Neurobiology. *Cell*  
405 *Rep.* **2**, 991–1001 (2012).
- 406 22. Tirian, L. & Dickson, B. The VT GAL4, LexA, and split-GAL4 driver line collections  
407 for targeted expression in the *Drosophila* nervous system. *bioRxiv* 198648 (2017).  
408 doi:10.1101/198648
- 409 23. Klapoetke, N. C. *et al.* Independent optical excitation of distinct neural populations.  
410 *Nat. Methods* **11**, 338–346 (2014).
- 411 24. Agrawal, S., Safarik, S. & Dickinson, M. The relative roles of vision and  
412 chemosensation in mate recognition of *Drosophila melanogaster*. *J. Exp. Biol.* **217**,  
413 2796–805 (2014).
- 414 25. Littleton, J. T., Bellen, H. J. & Perin, M. S. Expression of synaptotagmin in  
415 *Drosophila* reveals transport and localization of synaptic vesicles to the synapse.  
416 *Development* **118**, 1077–88 (1993).
- 417 26. Clemens, J. *et al.* Discovery of a new song mode in *Drosophila* reveals hidden  
418 structure in the sensory and neural drivers of behavior. *bioRxiv* 221044 (2017).  
419 doi:10.1101/221044
- 420 27. Sakurai, A. & Katz, P. S. Artificial Synaptic Rewiring Demonstrates that Distinct  
421 Neural Circuit Configurations Underlie Homologous Behaviors. *Curr. Biol.* **27**,  
422 1721–1734.e3 (2017).
- 423 28. Coen, P. *et al.* Dynamic sensory cues shape song structure in *Drosophila*. *Nature*  
424 **507**, 233–237 (2014).
- 425 29. Bentley, D. Control of cricket song patterns by descending interneurons. *J. Comp.*  
426 *Physiol.* **116**, 19–38 (1977).
- 427 30. Robie, A. A. *et al.* Mapping the Neural Substrates of Behavior. *Cell* **170**, 393–  
428 406.e28 (2017).
- 429 31. Markow, T. A. & O’Grady, P. M. *Drosophila: a guide to species identification and*  
430 *use.* (Elsevier, 2006).
- 431 32. Tanaka, R., Higuchi, T., Kohatsu, S., Sato, K. & Yamamoto, D. Optogenetic  
432 Activation of the fruitless -Labeled Circuitry in *Drosophila subobscura* Males  
433 Induces Mating Motor Acts. *J. Neurosci.* **37**, 11662–11674 (2017).
- 434
- 435
- 436

## 437 **Supplementary Information**

438

## 439 **Methods**

440

### 441 **Transgenic lines**

442 In total, we generated 30 transgenic lines, including 7 UAS effector reagents, 12 GAL4  
443 reagents, 8 split-GAL4 reagents, and 3 CRISPR/Cas9-mediated knock-in reagents in *D.*  
444 *yakuba* and *D. santomea*. Details are described in Supplementary Table 1. All  
445 transgenic injections were performed by Rainbow Transgenic Flies, *Inc* using standard  
446 protocols. Most of the plasmids were provided by Gerry Rubin.

447

### 448 **Generation of *fru* GAL4, AD and DBD knock-in alleles**

449 In general, the *fru* knock-in alleles were generated by precisely replacing the first exon  
450 of the male-specific *fru* isoform with GAL4, AD, and DBD fragment respectively via  
451 CRISPR/Cas9-mediated HDR. The GAL4, AD (p65ADZp), and DBD (ZpGAL4DBD)  
452 insertion fragments were amplified from the plasmids pBPGuW, pBPp65ADZpUw, and  
453 pBPZpGAL4DBDUw (Addgene), respectively. The donor plasmids were constructed by  
454 concatenating a 1.2 kb left homology arm, the insertion fragment (GAL4, AD or DBD), a  
455 3XP3::DsRed marker (in inverted sequence), a 1.1 kb right arm, and a 1.8 kb backbone  
456 using Gibson Assembly<sup>33</sup>. A pair of guide RNAs (5'-GCGACGTCACAGGATTATTT-3'  
457 and 5'-GGAGGCTTACCTAGGGGATG-3') was cloned into the PCFD4 plasmid<sup>34</sup>. The  
458 donor plasmid, the PCFD4 plasmid, and *in vitro* transcribed *D. melanogaster* codon  
459 optimized Cas9 mRNA were co-injected into the embryos as described previously<sup>35</sup>.

460

### 461 **Behavioural apparatus**

462 The song recording apparatus was described previously<sup>8</sup>. A CMOS camera (Point Grey  
463 Flea3 1.3 MP Mono USB3) with F1.4 25mm lens (Navitar) was placed 22 cm above the  
464 behavioural chamber for video recording. Synchronization between audio and video was  
465 achieved by triggering each frame with a pulse generated by the same data acquisition  
466 board (National Instruments) that digitized the audio.

467 For CsChrimson stimulation, red LEDs (635 nm) were placed 6 cm above the  
468 behavioural chamber to provide the light stimulus. Pulse-width modulation with a 100  
469 kHz frequency was used to adjust the light intensity with a custom-build high-side  
470 switching LED controller, a data acquisition board (National Instruments) was used to  
471 generate the timing signal for the light stimulus. The synchronization of this stimulus  
472 was achieved by recording the output of the controller on the same data acquisition  
473 board that digitized the audio. Infrared LEDs (850 nm) were used to provide illumination  
474 for video recording, and the lens was attached with an 800 nm long pass filter  
475 (Thorlabs) to remove light produced by the red LEDs.

476 The audio, video, and light stimulus data were captured using the custom Matlab  
477 program *omnivore* (<https://github.com/bjarthur/omnivore>). Data were visualized and  
478 movies were exported using the custom Matlab program *Tempo*  
479 (<https://github.com/JaneliaSciComp/tempo>).

### 480 **Courtship song analysis**

481 The *D. melanogaster* song was segmented using FlySongSegmenter<sup>36</sup> with modified  
482 parameters<sup>37</sup> to capture higher frequency pulse events. The *D. simulans* and *D.*  
483 *mauritiana* song was also segmented using FlySongSegmenter with different  
484 parameters<sup>35</sup>. For *D. yakuba* and *D. santomea* song, we developed an approach  
485 (<https://github.com/gordonberman/FlySongClusterSegment>) to automatically classify  
486 pulse and clack song. In brief, we sampled a subset of putative song events that are  
487 above noise threshold from a training set of *D. yakuba* and *D. santomea* wild-type  
488 songs, performed *k*-means clustering, and manually defined each cluster as template  
489 for pulse, clack, or noise. Models were constructed from each of these templates, such  
490 that a new event could be assigned a likelihood (p(event | template)). Data from  
491 subsequent songs were assigned to one of the song templates by finding the maximum  
492 likelihood template. Template assignments for the training set were manually checked to  
493 ensure accuracy. For each song type, we used a combination of “good” templates  
494 created from multiple training subsets and added additional templates until we were  
495 satisfied with the resulting assignments. All the *D. yakuba* and *D. santomea* songs were  
496 analyzed using the same set of templates. Courtship song elicited by P1 activation in *D.*



497 *yakuba* was manually annotated, as large amount of other courtship behaviors elicited,  
498 including abdomen quivering and wing scissoring, generated sound that confounded  
499 automatic song identification. Clack-like song in wild-type *D. melanogaster* was  
500 manually annotated as train of pulses ( $n > 2$ ) generated when males vibrated both  
501 wings behind the body.

502 Song parameters were measured using BatchSongAnalysis  
503 (<https://github.com/dstern/BatchSongAnalysis>) with modifications to analyze *D. yakuba*  
504 and *D. santomea* data. We characterized pulse carrier frequency in the following way.  
505 Individual pulse events represent acceleration of the wing from a stationary position to a  
506 maximum velocity and then deceleration of the wing to a stationary position again.  
507 Consequently, power of an individual pulse event can be distributed across a wide  
508 frequency range. We observed that the fast Fourier transform of individual pulses  
509 sometimes had a single strong peak at a single frequency and sometimes had power  
510 distributed across a range of frequencies. Thus, there does not appear to be an  
511 obviously single best way to measure the “carrier frequency” of a pulse event. We  
512 therefore measured pulse carrier frequency in two different ways and compared the  
513 results. First, we identified the dominant peak in the spectrogram. Second, we  
514 calculated the spectral centroid (“center of mass”) of the spectrogram, as recommended  
515 by Clemens et al<sup>26</sup>. The results from both methods produced qualitatively similar  
516 patterns and we show the results from analysis of the major peak of the fast Fourier  
517 transform in the figures.

518

## 519 **Video analysis**

520 All videos were recorded at a frame rate of 30 Hz. Automatic fly tracking was achieved  
521 using the pixel classification and animal tracking functions of *ilastik*<sup>38</sup> and manually  
522 checked afterwards. The male and female speed during singing were measured as the  
523 distance of fly centers over a 200 ms time window centered by each song event. The  
524 relative positions of males to females were manually annotated by measuring the  
525 distance between their thoracic centers and the angle between their body axes. Frames  
526 were excluded from analysis if the male and female were positioned on opposite sides

527 of the chamber or if one or both flies were positioned on a wall. Wing angle was  
528 manually annotated by measuring the angle between the thoracic center-wing distal end  
529 axis and the body axis. To establish the relationship between wing angle and pulse  
530 carrier frequency, we randomly measured the wing angle of one event among all the  
531 pulse events with the same frequency (closest integer) within the defined range (*D.*  
532 *melanogaster*: 150 - 500 Hz; *D. simulans* and *D. mauritiana*: 150 - 650 Hz), and four  
533 animals were scored for each species.

534

### 535 **Behavioural experiments**

536 To characterize song types of the *D. melanogaster* species subgroup (results shown in  
537 Fig. 1i and Extended Data Fig. 1), we used relatively larger chamber (2 cm X 4 cm) to  
538 capture a wider range of courtship dynamics than are normally observed in smaller  
539 chambers. A 4-10 day old virgin male (single housed) and a 3-5 day old virgin female  
540 (group housed) were placed into the chamber and recorded for 20-30 minutes. *D.*  
541 *sechellia*, *D. teissieri*, and *D. orena* males did not court much under this setting, so they  
542 were further recorded using a smaller round chamber (1 cm diameter) to collect more  
543 courtship events. For each species, At least 10 recordings with abundant song were  
544 collected. The strain information and the sample size for each species are described in  
545 Supplementary Table 2. All other song recordings in this study employed 1 cm diameter  
546 chambers.

547 For pIP10 inactivation in *D. melanogaster* and *D. yakuba*, experimental flies were  
548 obtained by crossing split-GAL4 males with females carrying a UAS line for a neuronal  
549 inhibitor (UAS-Kir2.1 or UAS-TNT), and control flies were obtained by crossing neuronal  
550 inhibitors to the corresponding AD or DBD lines alone. For the *D. melanogaster* split  
551 VT040556-AD  $\cap$  VT040347-DBD, males were crossed to Kir2.1 females ( $w^+$ ; UAS-  
552 Kir2.1). For the *D. yakuba* splits VT040346-AD; VT040556-DBD and VT040347-AD  $\cap$   
553 VT040346-DBD, males were crossed with females carrying 3XP3::DsRed marked Kir2.1  
554 in a wildtype background ( $yakw^+$ ; Kir2.1). This is not applicable for the split *fru*-AD;  
555 VT040346-DBD, because *fru*-AD is also marked with a 3XP3::DsRed and could not be  
556 maintained as homozygotes; therefore, males of this split were crossed to females

557 carrying the neuronal inhibitor in a *white* mutant background (*yak2180\_Kir2.1* and  
558 *yak2180\_TNT*). For pIP10 inactivation in *D. santomea*, experimental flies were obtained  
559 by crossing the GAL4 males (*san2150\_VT040556*) with Kir2.1 females  
560 (*san2174\_Kir2.1*), and crossing the GAL4 and Kir2.1 males with the *D. santomea* white  
561 females (with the same genetic background as the GAL4 and Kir2.1 flies) to generate  
562 the controls. For song recording, a 5-7 day old virgin male (single housed) and a < 1  
563 day old virgin female (group housed) were placed into a 1 cm diameter chamber and  
564 recorded for 30 minutes. To measure copulation latency, a 4-7 day old virgin male  
565 (single housed) and a 4-7 day old virgin female (group housed) were placed in 1 cm  
566 diameter chambers and video recordings were collected for 60 minutes. Copulation time  
567 was scored manually. The control and experimental groups were always recorded  
568 simultaneously.

569 For CsChrimson experiments, the split-GAL4 males were crossed to females  
570 carrying UAS-CsChrimson (*D. melanogaster*: 20XCsChrimson-mVenus; *D. yakuba*:  
571 20XCsChrimson-tdTomato). Males were collected 1-2 days after eclosion and group-  
572 housed in the dark for 6-7 days on standard media containing 0.5 mM trans-retinal  
573 (Sigma-Aldrich). Single isolated males were used for the experiments. To elicit pulse  
574 song for P1 activation in *D. yakuba*, we also included a 6-7 day old group-housed male  
575 to provide a moving object. Constant red light was applied for stimulation, and the  
576 specific protocols for each experiment are described in the following paragraph.

577 To activate P1 neurons, five replicates of a 30 s OFF and 30 s ON stimulation  
578 cycle were performed at the following light intensities from low to high: 2.5  $\mu\text{W}/\text{mm}^2$ , 5.3  
579  $\mu\text{W}/\text{mm}^2$ , 8.0  $\mu\text{W}/\text{mm}^2$ , and 10.8  $\mu\text{W}/\text{mm}^2$ . A 5-minute resting period was provided  
580 before stimulation at the next intensity level. To activate pIP10 neurons, a stimulation  
581 cycle consists of 20 s OFF and 10 s ON period at the following light intensities from low  
582 to high: 1.2  $\mu\text{W}/\text{mm}^2$ , 2.5  $\mu\text{W}/\text{mm}^2$ , 5.3  $\mu\text{W}/\text{mm}^2$ , 8.0  $\mu\text{W}/\text{mm}^2$ , 10.8  $\mu\text{W}/\text{mm}^2$ , and 15.6  
583  $\mu\text{W}/\text{mm}^2$ . This cycle was repeated ten times. The above two protocols were designed  
584 differently because the temporal dynamics of behavioural response to light stimulation  
585 differ between P1 and pIP10. P1 activation elicits courtship behaviour in a probabilistic  
586 manner: the elicited behaviour is not time locked to the stimulation and occurs with

587 variable latencies<sup>18,19</sup>. We therefore allowed completion of behaviours in response to  
588 stimulation before increasing the intensity level. In contrast, pIP10 activation elicits  
589 courtship song acutely, so each cycle includes stimulation with a ramping intensity. For  
590 activating pIP10 neurons with a ramping intensity using small incremental step, a  
591 stimulation cycle consists of 10 s OFF and 5 s ON period at an intensity from 0.5  
592  $\mu\text{W}/\text{mm}^2$  to 5.3  $\mu\text{W}/\text{mm}^2$  with an incremental step of  $\sim 0.25 \mu\text{W}/\text{mm}^2$ . Four repeats of  
593 this cycle were performed.

594 During analysis of song phenotypes, outliers were systematically excluded in our  
595 song analysis pipeline using the Grubbs test with  $\alpha=0.05$   
596 (<http://www.mathworks.com/matlabcentral/fileexchange/3961-deleteoutliers>). *P* values  
597 for ANOVAs were estimated with 10,000 permutations  
598 (<http://www.mathworks.com/matlabcentral/fileexchange/44307-randanova1>). For testing  
599 copulation latency, *P* values were calculated via a logrank test.

600

## 601 **Immunostaining and imaging**

602 The dissections, immunohistochemistry, and imaging of fly central nervous systems  
603 were done as described previously (Aso et al., 2014). In brief, brains and VNSs were  
604 dissected in Schneider's insect medium and fixed in 2% paraformaldehyde (diluted in  
605 the same medium) at room temperature for 55 min. Tissues were washed in PBT (0.5%  
606 Triton X-100 in phosphate buffered saline) and blocked using 5% normal goat serum  
607 before incubation with antibodies. Tissues expressing GFP were stained with rabbit anti-  
608 GFP (ThermoFisher Scientific A-11122, 1:1000) or chicken anti-GFP (Abcam ab13970,  
609 1:1200) and mouse anti-BRP hybridoma supernatant (nc82, Developmental Studies  
610 Hybridoma Bank, Univ. Iowa, 1:30), followed by Alexa Fluor® 488-conjugated goat anti-  
611 rabbit or goat anti-chicken and Alexa Fluor® 568-conjugated goat anti-mouse  
612 (ThermoFisher Scientific A-11034 and A-11031) or ATTO 647-conjugated goat anti-  
613 mouse (15048, Active Motif) antibodies, respectively. Tissues expressing tdTomato  
614 were stained with rabbit anti-DsRed (Clontech 632496, 1:1000) and nc82 (see above),  
615 followed by Cy<sup>TM</sup>3-conjugated goat anti-rabbit and Cy<sup>TM</sup>2-conjugated goat anti-mouse  
616 antibodies (Jackson ImmunoResearch 111-165-144 and 115-225-166), respectively.

617 For polarity staining, tissues expressing GFP and SYN::HA in pIP10, driven by the *D.*  
618 *melanogaster* split-GAL4 line VT040556-AD  $\cap$  VT040347-DBD, were stained with  
619 chicken anti-GFP (see above), rabbit anti-HA (Cell Signaling Technology #3724,  
620 1:1000), and nc82 (see above), followed by goat anti-chicken AlexaFluor 488  
621 conjugated (Thermo Fisher Scientific A-11039), Goat anti-rabbit, Cy5 conjugated  
622 (Jackson ImmunoResearch 111-175-144), and goat anti-mouse, AlexaFluor 568  
623 conjugated (see above), respectively. After staining and post-fixation in 4%  
624 paraformaldehyde, tissues were mounted on poly-L-lysine-coated cover slips, cleared,  
625 and embedded in DPX as described. Image z-stacks were collected at 1  $\mu$ m intervals  
626 using an LSM710 or LSM880 confocal microscope (Zeiss, Germany) fitted with a Plan-  
627 Aplanachromat 20x/0.8 M27 objective. Parent GAL4 images of *D. melanogaster* are from  
628 Jennet et al., 2012. Images of VT040346, VT040347, and VT040556 and all male split-  
629 GAL4, *D. yakuba*, and *D. santomea* images were generated by the FlyLight project  
630 team.

631

### 632 **pIP10 segmentation and quantification**

633 pIP10 split-GAL4 lines (*D. melanogaster*: VT040556-AD  $\cap$  VT040347-DBD, *D. yakuba*:  
634 VT040436-AD  $\cap$  VT040556-DBD) were registered using the Computational  
635 Morphometry Toolkit (<http://nitrc.org/projects/cmtk>)<sup>39</sup> to the JFRC 2010 brain template  
636 and a newly generated VNS template. pIP10 neurons were segmented by extracting the  
637 pIP10 signal from non-target neuron expression using VVD Viewer  
638 ([https://github.com/takashi310/VVD\\_Viewer/blob/master/README.md](https://github.com/takashi310/VVD_Viewer/blob/master/README.md))<sup>40,41</sup>. Individual  
639 pIP10 arbors were then further segmented into unambiguous compartments to compare  
640 arbor volume across species (Fig. 4). Like arbors from the left and right pIP10 neurons  
641 were combined in each individual. In the brain, the medial arbors (red region 2) were  
642 defined as those extending from the medial, horizontal branch that is the most proximal  
643 projection to the soma, the dorsal arbors (cyan region 1) as those extending from the  
644 branch projecting dorsally from the medial branch, the ventral arbors (green region 3) as  
645 those extending from the branch projecting ventrally from the medial branch, the ventral-  
646 posterior arbors (magenta region 7, found only in *D. melanogaster*) as those extending

647 from the branch projecting posteriorly from the ventral branch, the dorsal SEZ arbors  
648 (yellow region 4) as those extending from the two dorsal-most branches projecting from  
649 the descending projection into the SEZ, the ventral SEZ arbors (blue region 5, only  
650 found in *D. yakuba*) as those extending from the one ventral-most branch projecting  
651 from the descending projection into the SEZ, and the soma arbors (orange region 6,  
652 only found in *D. yakuba*) as those extending from the smaller, secondary branch  
653 proximal to the soma. In the VNS, the anterior triangle arbors (cyan region 8) were  
654 defined as those extending from the anterior most portion of the mesothoracic triangle  
655 projections, the medial triangle arbors (red region 9) as those medial to the descending  
656 projection at the base of the mesothoracic triangle projections, the lateral triangle arbors  
657 (green region 10) as those lateral to the descending projection at the base of the  
658 mesothoracic triangle projections, the T2 descending arbors (yellow region 11, only  
659 present in 1/5 *D. melanogaster* and 3/5 *D. yakuba*) as those extending from the  
660 descending projection in the T2 neuropil, and the T3 descending arbors (blue region 12  
661 and magenta region 13) as those extending from the descending projection in the T3  
662 neuropil. VVD Viewer was used to calculate the voxel volume of each of these  
663 compartments. Significance was determined via two-tailed t-tests of each compartment  
664 across species.

665

### 666 **Cuticle light penetrance**

667 An optical fiber (Thorlabs, FG105LVA) connected (S151C, Thorlabs) to a ThorLabs  
668 PM100D Compact Power and Energy Meter was positioned in front of a 3 mm LED fiber  
669 connected to a CoolLED pE4000 so that the LED would illuminate the front of the bare  
670 fiber (the only portion of the fiber that responded to light). Male flies were decapitated  
671 and the bare fiber was inserted into the head via the neck connective. 470, 525, 580,  
672 595, and 635 nm constant on light pulses were presented in a quasi-random order. Light  
673 power for each wavelength was recorded once the measurement stabilized. The head  
674 was then carefully removed from the fiber and light was presented to the fiber again for  
675 measurement. Penetrance was calculated as the light power measurement in the head

676 divided by the measurement without the head present. Measurements were similar to a  
677 previous *D. melanogaster* report<sup>19</sup>.

678

### 679 **Irradiance calculation for behaviour and electrophysiology experiments**

680 Irradiance was measured using a ThorLabs PM100D Compact Power and Energy Meter  
681 with a Console S130C Slim Photodiode Power Sensor. For behaviour experiments, the  
682 sensor (diameter, 9.5 mm) was positioned in the same location as the arena (diameter,  
683 10.5 mm) directly over the recording chamber microphone. Irradiance was calculated as  
684 the raw light power measured divided by the area of the sensor (70.88 mm<sup>2</sup>).

685 For electrophysiology experiments, the 635 nm LED stimulus (pE4000, CoolLED)  
686 was delivered (with stacked 2.0 and 1.0 neutral density filters in the beam path) through  
687 a Zeiss Examiner Z1 with a W N-Achroplan 40X/0.75 water objective. The patched  
688 pIP10 soma was positioned in the center of the objective, and thus, in the center of the  
689 focused LED beam. The LED beam size was calculated using a beam profiler  
690 (WinCamD-UCD12, DataRay) with the sensor placed at approximately the same  
691 distance from the objective as the sample during experiments (2 mm). This yielded a  
692  $1/e^2$  beam area of 0.95 mm<sup>2</sup>. Light power was also measured with the sensor placed 2  
693 mm away from the center of the objective. In an effort to measure the light power of the  
694 focused beam and reduce the amount of unfocused or reflected light from being  
695 measured by the 70.88 mm<sup>2</sup> sensor, a painted black foil sheath was placed over the  
696 sensor with an opening for the objective to deliver light. Irradiance was calculated as the  
697 raw light power measured divided by the 0.95 mm<sup>2</sup> focused beam area.

698

### 699 **Electrophysiology**

700 Male flies were collected shortly after eclosion and housed in isolation. 1-3 day old and  
701 6-8 day old flies were tested. Because no age-related differences were found in any  
702 electrophysiological properties measured, flies within species were pooled. Individual  
703 flies were anesthetized by cooling. The brain and VNS were removed from the animal  
704 and placed into external saline composed of (in mM) 103 NaCl, 3 KCl, 5 N-  
705 tris(hydroxymethyl) methyl-2-aminoethane-sulfonic acid, 10 trehalose dihydrate, 10

706 glucose, 26 NaHCO<sub>3</sub>, 1 NaH<sub>2</sub>PO<sub>4</sub>, 4 MgCl<sub>2</sub>, 3 KCl, 2 sucrose, and 1.5 CaCl<sub>2</sub> (280-290  
707 mOsm, pH 7.3; components from Sigma Aldrich). The connective tissue and sheath  
708 were removed using fine forceps and the CNS was transferred to a chamber (Series 20  
709 Chamber, Warner Instruments) superfused with external saline (carboxygenated with  
710 95%O<sub>2</sub> and 5%CO<sub>2</sub>) and held into place via a custom holder.

711 Fluorophore expressing pIP10 neurons were visualized using a Zeiss Examiner  
712 Z1 with a W N-Achroplan 40X/0.75 water objective, 470 nm or 580 nm LED illumination  
713 (pE-4000, CoolLED), and an IR-1000 infrared CCD monochrome video camera (Dage-  
714 MTI). The pIP10 soma was clearly identifiable as the only fluorophore expressing  
715 neuron in the region. Whole-cell recordings were obtained using glass patch electrodes  
716 filled with an internal solution composed of (in mM) 140 K-gluconate, 10 HEPES, 1 KCl,  
717 4 MgATP, 0.5 Na<sub>3</sub>GTP, and 1 EGTA (270-280 mOsm, pH 7.3, components from Sigma  
718 Aldrich) connected to an Axopatch 700B amplifier (Molecular Devices) and digitized (10  
719 kHz) with a Micro 1401-3 using Spike2 software (Cambridge Electronic Design). Glass  
720 electrodes were made using a P-1000 micropipette puller (Sutter) from borosilicate  
721 glass (Sutter; 1.2 mm outer diameter, 0.69 mm inner diameter). The pipette tip opening  
722 was less than one micron with a resistance between 5 and 15 MΩ.

723 pIP10 neurons were recorded in current clamp mode. The input resistance of  
724 pIP10 was tested intermittently throughout the recording and was above 600 MΩ for all  
725 data here. All data except for light dose-response recordings were obtained in pIP10  
726 neurons expressing either 10XUAS-IVS-mCD8::GFP (*D. melanogaster*) or UAS-myr-  
727 GFP (*D. yakuba*). Light dose-response recordings were obtained in pIP10 neurons  
728 expressing 20XC<sub>s</sub>Chrimson-mVenus (*D. melanogaster*) or 20XC<sub>s</sub>Chrimson-tdTomato  
729 (*D. yakuba*). The spike threshold was determined as the lowest membrane potential at  
730 which pIP10 fired action potentials. Spike amplitude and afterhyperpolarization  
731 amplitude were measured for 5 spikes fired near threshold and averaged. pIP10 rested  
732 ~5 mV below spike threshold in both species and was held ~5 mV below spike  
733 threshold while light dose-response experiments were conducted. pIP10 was excited by  
734 a constant-on 5s depolarizing current steps or 635 nm light pulses delivered every 30 s  
735 through the objective while recording from the soma which was positioned in the center



736 of the field of view. The light stimuli were similar to those used in behaviour experiments  
737 (both constant on stimuli; similar range of irradiance based on cuticle penetrance  
738 calculations). Light irradiance and current amplitude presentation order was varied from  
739 experiment to experiment. There was no indication that the order of intensity  
740 presentation affected the pIP10 response. Spikes were identified and counted using  
741 Spike2 scripts, and verified via manual inspection. Spike frequency (total spikes/5s) was  
742 plotted versus current step amplitude or light stimulus irradiance (SigmaPlot 12.5).

743

### 744 **Supplementary references**

- 745 33. Gibson, D. G. *et al.* Enzymatic assembly of DNA molecules up to several hundred  
746 kilobases. *Nat. Methods* **6**, 343–345 (2009).
- 747 34. Port, F., Chen, H.-M., Lee, T. & Bullock, S. L. Optimized CRISPR/Cas tools for  
748 efficient germline and somatic genome engineering in *Drosophila*. *Proc. Natl.*  
749 *Acad. Sci.* **111**, E2967–E2976 (2014).
- 750 35. Ding, Y., Berrocal, A., Morita, T., Longden, K. D. & Stern, D. L. Natural courtship  
751 song variation caused by an intronic retroelement in an ion channel gene. *Nature*  
752 **536**, 329–332 (2016).
- 753 36. Arthur, B. J., Sunayama-Morita, T., Coen, P., Murthy, M. & Stern, D. L. Multi-  
754 channel acoustic recording and automated analysis of *Drosophila* courtship songs.  
755 *BMC Biol.* **11**, 11 (2013).
- 756 37. Stern, D. L. *et al.* Experimental and statistical reevaluation provides no evidence  
757 for *Drosophila* courtship song rhythms. *Proc. Natl. Acad. Sci. U. S. A.* **114**, 9978–  
758 9983 (2017).
- 759 38. Sommer, C., Straehle, C., Kothe, U. & Hamprecht, F. A. Ilastik: Interactive  
760 learning and segmentation toolkit. in *Eighth IEEE International Symposium on*  
761 *Biomedical Imaging (ISBI). Proceedings*, 230–233 (IEEE, 2011).  
762 doi:10.1109/ISBI.2011.5872394
- 763 39. Jefferis, G. S. X. E. *et al.* Comprehensive maps of *Drosophila* higher olfactory  
764 centers: spatially segregated fruit and pheromone representation. *Cell* **128**, 1187–  
765 203 (2007).
- 766 40. Wan, Y., Otsuna, H., Chien, C.-B. & Hansen, C. An interactive visualization tool  
767 for multi-channel confocal microscopy data in neurobiology research. *IEEE Trans.*  
768 *Vis. Comput. Graph.* **15**, 1489–96 (2009).
- 769 41. Wan, Y., Otsuna, H., Chien, C.-B. & Hansen, C. FluoRender: An Application of 2D  
770 Image Space Methods for 3D and 4D Confocal Microscopy Data Visualization in  
771 Neurobiology Research. *IEEE Pacific Vis. Symp.* 201–208 (2012).

772

773

774 **SI Movie 1: Primary male courtship song types for all nine species in the *D.***  
775 ***melanogaster* species subgroup.** For each song type in each species, 6-25  
776 representative song clips were randomly chosen and concatenated for demonstration.  
777 The nomenclatures of song types are consistent with Extended Data Fig. 1.

778  
779 **SI Movie 2: Courtship behaviors elicited by P1 CsChrimson activation in *D.***  
780 ***yakuba*.** For each P1 split-GAL4 driver, representative examples of pulse song, clack  
781 song, abdomen quivering, wing rowing, and wing scissoring elicited by CsChrimson  
782 activation were shown.

783  
784 **SI Movie 3: Courtship songs elicited by pIP10 CsChrimson activation with**  
785 **ramping irradiances in *D. yakuba*.** Expression of CsChrimson in pIP10 neuron was  
786 driven by the split-GAL4 line VT040346-AD  $\cap$  VT040556-DBD. Light stimulation window  
787 and irradiance level were indicated in the video. Lower irradiance level elicited only  
788 clack song, featured by higher frequency pulses produced by vibration of both wings  
789 behind the body. Higher irradiance levels first elicited clack song and then pulse song,  
790 featured by lower frequency pulses produced by vibration of a single extended wing.  
791 The transition from clack to pulse occurred sooner with increasing irradiances.

792  
793 **SI Movie 4: Clack-like song elicited by pIP10 CsChrimson activation with ramping**  
794 **irradiances in *D. melanogaster*.** Expression of CsChrimson in pIP10 neuron was  
795 driven by the split-GAL4 line VT040556-AD  $\cap$  VT040347-DBD. Light stimulation window  
796 and irradiance level were indicated in the video. The lower stimulation level mostly  
797 triggered clack-like song, and the higher stimulation level triggered pulse song with  
798 small amount of sine song.

799  
800 **SI Movie 5: Clack-like song elicited by P1 CsChrimson activation in *D.***  
801 ***melanogaster*.** For each P1 split-GAL4 driver, two representative clips were randomly  
802 chosen and concatenated for demonstration.

803

804 **SI Movie 6: pIP10 anatomy in *D. melanogaster* and *D. yakuba*.** Individual  
805 representative examples of pIP10 in *D. melanogaster* (green) and *D. yakuba* (magenta)  
806 registered and overlaid on a common *D. melanogaster* template brain and VNS.

807

808 **SI Movie 7: pIP10 synaptotagmin expression in *D. melanogaster*.** Synaptotagmin  
809 expression in five registered *D. melanogaster* pIP10 neurons overlaid on a common *D.*  
810 *melanogaster* template brain and VNS. Each individual is a different color.

811

812 **SI Movie 8: Clack-like songs in wild-type *D. melanogaster*.** Four representative song  
813 clips were randomly chosen and concatenated for demonstration.

814  
815

## Supplementary Table 1: Details of the transgenic lines generated in this study.

| Stock Name           | Donor Plasmid                       | Fly Strain         | Species            | Method               |
|----------------------|-------------------------------------|--------------------|--------------------|----------------------|
| yakw; myrGFP         | pBac{UAS-myrGFP, mw+}               | UCSD 14021-0261.02 | <i>D. yakuba</i>   | piggBac transgenesis |
| yakw+; Kir2.1        | pBac{UAS-EGFP::Kir2.1, 3XP3::DsRed} | UCSD 14021-0261.01 | <i>D. yakuba</i>   | piggBac transgenesis |
| yak1730_CsChrimson   | 20xUAS-CsChrimson::tdTomato         | yak1730            | <i>D. yakuba</i>   | attB/P integration   |
| yak2180_Kir2.1       | pJFRC49 10XUAS-EGFP::Kir2.1         | yak2180            | <i>D. yakuba</i>   | attB/P integration   |
| yak2180_TNT          | pJFRC34 5XUAS-TNT                   | yak2180            | <i>D. yakuba</i>   | attB/P integration   |
| san1504_CsChrimson   | 20xUAS-CsChrimson::tdTomato         | san1504            | <i>D. santomea</i> | attB/P integration   |
| san2174_Kir2.1       | pJFRC49 10XUAS-EGFP::Kir2.1         | san2174            | <i>D. santomea</i> | attB/P integration   |
| yak2180_R22D03       | R22D03-GAL4                         | yak2180            | <i>D. yakuba</i>   | attB/P integration   |
| yak2177_R22D03       | R22D03-GAL4                         | yak2177            | <i>D. yakuba</i>   | attB/P integration   |
| yak2180_R71G01       | R71G01-GAL4                         | yak2180            | <i>D. yakuba</i>   | attB/P integration   |
| yak2177_R71G01       | R71G01-GAL4                         | yak2177            | <i>D. yakuba</i>   | attB/P integration   |
| yak1730_R15A01       | R15A01-GAL4                         | yak1730            | <i>D. yakuba</i>   | attB/P integration   |
| yak1664_R15A01       | R15A01-GAL4                         | yak1664            | <i>D. yakuba</i>   | attB/P integration   |
| yak1664_VT040346     | VT040346-GAL4                       | yak1664            | <i>D. yakuba</i>   | attB/P integration   |
| yak1694_VT040346     | VT040346-GAL4                       | yak1694            | <i>D. yakuba</i>   | attB/P integration   |
| san2092_VT040346     | VT040346-GAL4                       | san2092            | <i>D. santomea</i> | attB/P integration   |
| yak1694_VT040347     | VT040347-GAL4                       | yak1694            | <i>D. yakuba</i>   | attB/P integration   |
| san2150_VT040556     | VT040556-GAL4                       | san2150            | <i>D. santomea</i> | attB/P integration   |
| san2151_VT040556     | VT040556-GAL4                       | san2151            | <i>D. santomea</i> | attB/P integration   |
| yak2180_R71G01-AD    | R71G01-p65ADZp                      | yak2180            | <i>D. yakuba</i>   | attB/P integration   |
| yak2177_R71G01-DBD   | R71G01-ZpGAL4DBD                    | yak2177            | <i>D. yakuba</i>   | attB/P integration   |
| yak2177_R15A01-DBD   | R15A01-ZpGAL4DBD                    | yak2177            | <i>D. yakuba</i>   | attB/P integration   |
| yak2177_R22D03-DBD   | R22D03-ZpGAL4DBD                    | yak2177            | <i>D. yakuba</i>   | attB/P integration   |
| yak2177_VT040346-AD  | VT040346-p65ADZp                    | yak2177            | <i>D. yakuba</i>   | attB/P integration   |
| yak2180_VT040346-DBD | VT040346-ZpGAL4DBD                  | yak2180            | <i>D. yakuba</i>   | attB/P integration   |
| yak2180_VT040347-AD  | VT040347-p65ADZp                    | yak2180            | <i>D. yakuba</i>   | attB/P integration   |
| yak2177_VT040556-DBD | VT040556-ZpGAL4DBD                  | yak2177            | <i>D. yakuba</i>   | attB/P integration   |
| yakw; fru-GAL4       | yakfruGAL4, 3XP3::DsRed             | UCSD 14021-0261.02 | <i>D. yakuba</i>   | CRISPR knock-in      |
| yakw; fru-AD         | yakfrup65ADZp, 3XP3::DsRed          | UCSD 14021-0261.02 | <i>D. yakuba</i>   | CRISPR knock-in      |
| yakw; fru-DBD        | yakfruZpGAL4DBD, 3XP3::DsRed        | UCSD 14021-0261.02 | <i>D. yakuba</i>   | CRISPR knock-in      |

816

817

818

819

820

**Supplementary Table 2: Wild-type strains of the *D. melanogaster* species subgroup used in this study.** The sample size of each strain used for characterizing song types was indicated.

| <b>Species</b>         | <b>Strain</b>      | <b>Sample Size</b> |
|------------------------|--------------------|--------------------|
| <i>D. melanogaster</i> | Oregon-R           | 13                 |
| <i>D. simulans</i>     | sim5               | 14                 |
| <i>D. mauritiana</i>   | mau29              | 16                 |
| <i>D. sechellia</i>    | UCSD 14021-0248.07 | 19                 |
| <i>D. yakuba</i>       | UCSD 14021-0261.02 | 24                 |
| <i>D. santomea</i>     | UCSD 14021-0271.00 | 12                 |
| <i>D. teissieri</i>    | UCSD 14021-0257.01 | 20                 |
| <i>D. orena</i>        | UCSD 14021-0245.01 | 14                 |
| <i>D. erecta</i>       | UCSD 14021-0224.01 | 20                 |

821

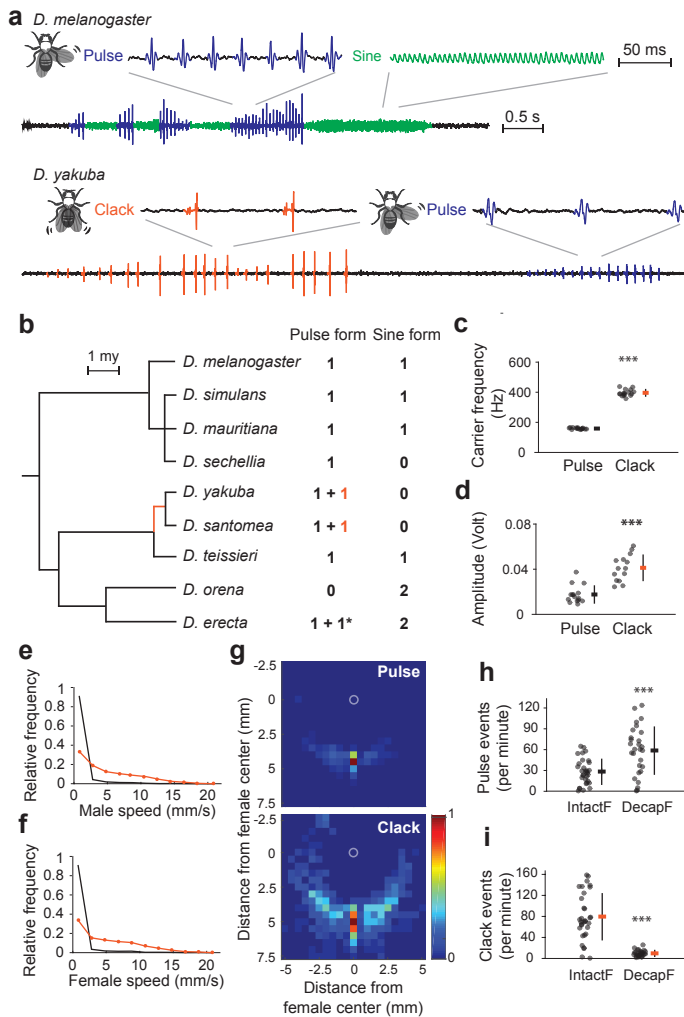

## Figure 1: Divergence of courtship song between *D. melanogaster* and *D. yakuba*.

**a**, Illustration of courtship song of *D. melanogaster* and *D. yakuba*. Pulse and sine song are both generated via unilateral wing extensions, and clack song is generated by double wing vibrations. **b**, Evolution of primary male courtship song types in the *D. melanogaster* species subgroup. Almost all species produce pulse song via unilateral wing vibration. *D. yakuba* and *D. santomea* produces clack song, a distinct pulse song form by vibrating both wings behind the body (orange). *D. erecta* produces an additional song type composed of polycyclic pulses by vibrating one, occasionally two, wing(s) behind the body (marked by asterisk). The details of song types are shown in Extended Data Fig. 1. **c**, **d**, Carrier frequency (**c**) and amplitude (**d**) of pulse and clack song in *D. yakuba*. **e**, **f**, Probability density of male (**e**) and female speed (**f**) when the males are singing pulse (black) and clack (orange) song.  $n = 6$ . **g**, A heat map showing the position of male centroids relative to a centered female centroid (0,0) at the time of pulse song (top,  $n = 5$ , events = 1202) versus clack song (bottom,  $n = 5$ , events = 1222) in *D. yakuba*. Color represents the relative density of males located within a  $0.25 \text{ mm}^2$  square unit and the map is normalized relative to the square with highest density. **h**, **i**, Number of pulse (**h**) and clack (**i**) events across the tested recording session using intact (IntactF) and decapitated (DecapF) females. For panels **c**, **d**, **h**, and **i**, data for each animal and mean  $\pm$  SD are shown.  $n > 16$ .  $P$  values estimated for one-way ANOVA using a permutation test. \*\*\*,  $P < 0.001$ .

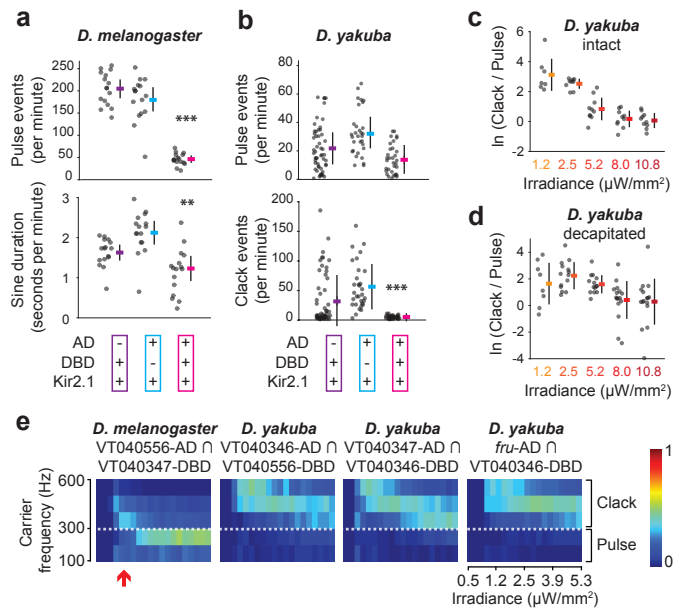

**Figure 2: Different roles of pIP10 neurons in *D. melanogaster* and *D. yakuba* courtship song.**

**a**, Pulse and sine song production of pIP10 silenced males (VT040556-AD  $\cap$  VT040347-DBD > Kir2.1) in *D. melanogaster*. **b**, Pulse and clack song production of pIP10 silenced males (VT040346-AD  $\cap$  VT040556-DBD > Kir2.1) in *D. yakuba*. *P* values estimated for one-way ANOVA using a permutation test. Significance is indicated only when the experimental group is significantly different from both control groups and the less significant result is shown. \*\*\*,  $p < 0.001$ ; \*\*,  $p < 0.01$ .  $n > 16$ . **c**, **d**, Natural log (ln) ratio of clack versus pulse events of pIP10 activated intact (**c**) and decapitated (**d**) males (VT040346-AD  $\cap$  VT040556-DBD > CsChrimson) at different irradiances in *D. yakuba*.  $n > 8$ . Data for each animal and mean  $\pm$  SD are shown. **e**, Heat map showing the distribution of song carrier frequency (pulse song for *D. melanogaster*; pulse and clack song combined for *D. yakuba*) of CsChrimson expressing pIP10 males with ramping irradiance using incremental steps of  $\sim 0.25 \mu\text{W}/\text{mm}^2$ . Color represents the relative density of song events within a given carrier frequency range at the tested irradiance. For each genotype, mean of eight tested animals is shown. See Extended Data Fig. 6i for the results of each tested animal. In *D. yakuba*, pIP10 activation elicited mostly high frequency song events, presumably clack song, across all the tested irradiance levels. In *D. melanogaster*, pIP10 activation elicited high-frequency clack-like events (300-600 Hz) only at the very lowest irradiance levels (red arrow).

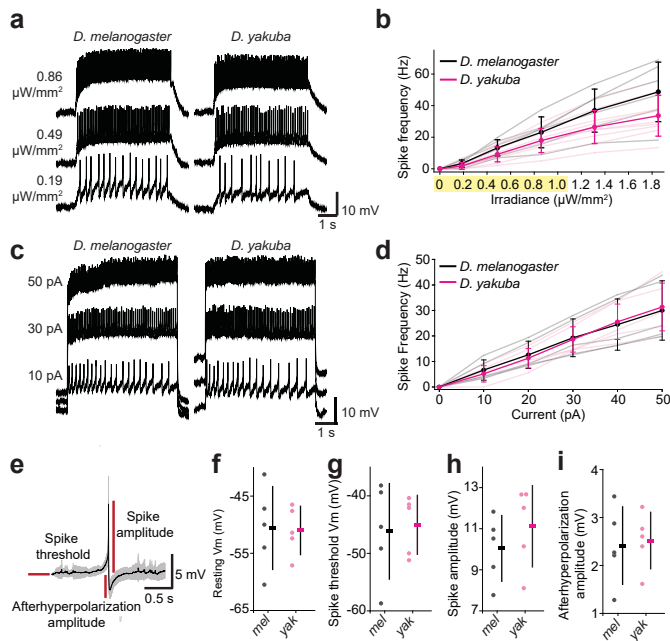

**Figure 3: pIP10 has similar electrophysiology properties in *D. melanogaster* and *D. yakuba*.**

**a, b**, Spiking responses of CsChrimson expressing pIP10 neurons to different light irradiances in *D. melanogaster* and *D. yakuba*: representative examples of pIP10 spiking responses (**a**) and light dose-response curve of pIP10 (**b**). The irradiance range comparable to the range applied in the behaviour experiments is highlighted in yellow. **c, d**, Spiking responses of pIP10 to depolarizing current steps of different amplitudes in *D. melanogaster* and *D. yakuba*: representative examples of pIP10 spiking responses (**c**) and dose-response curve of pIP10 (**d**). For panel **a** and **c**, the resting membrane potential has been shifted to ease viewing. For panel **b** and **d**, data for each animal (translucent lines) and mean  $\pm$  SD are shown.  $n = 5-9$ . Significance tested across species at each irradiance or current amplitude via two-way ANOVA and post-hoc Holm-Sidak pairwise multiple comparisons test. No significant differences. **e-h**, Comparison of pIP10 resting and spiking properties between *D. melanogaster* (*mel*) and *D. yakuba* (*yak*): resting membrane potential (**f**), spike threshold (**g**), spike amplitude (**h**), and afterhyperpolarization amplitude (**i**). Values for each animal and mean  $\pm$  SD are shown.  $n = 5$ . Significance tested across species via t-test. No significant differences.



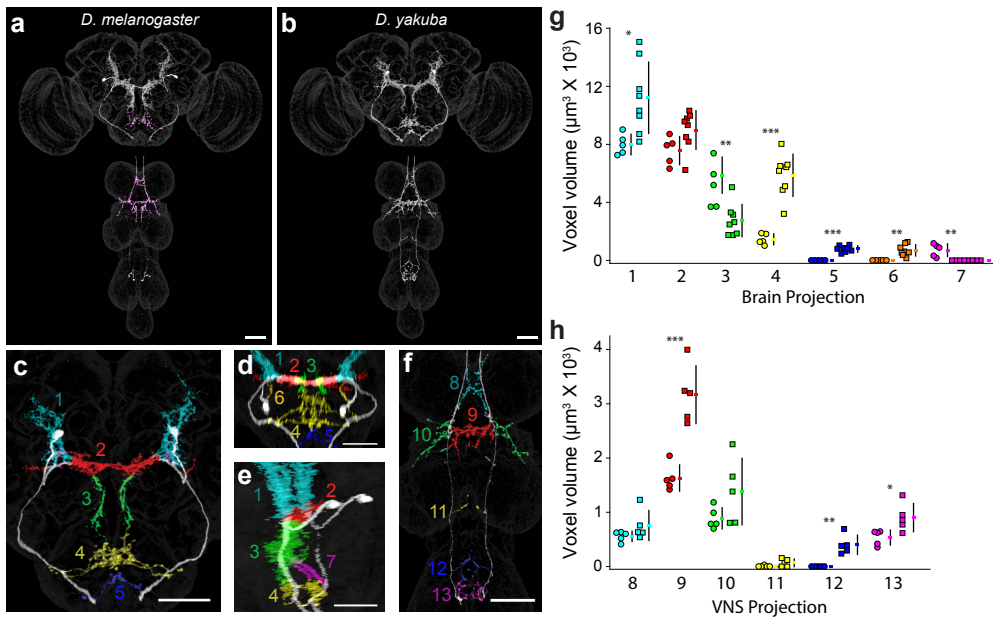

**Figure 4: pIP10 anatomy in *D. melanogaster* and *D. yakuba*.**

**a, b**, Maximum intensity projections of representative segmented pIP10 neurons in both species (white) and synaptotagmin expression (magenta) in *D. melanogaster* aligned to a standard *D. melanogaster* brain and ventral nervous system (VNS). **c-f**, Brain (**c-e**) and VNS (**f**) arbor compartments that were further segmented for quantification represented in *D. yakuba* (**c, d, f**) or *D. melanogaster* (**e**). Quantified regions are labeled with separate colours and numbered. The lateral projection into the SEZ (**c**, blue region 5) and additional projections in the T3 neuropil of the VNS (**f**, blue region 12) are found only in *D. yakuba*. Shifted angle of the brain illustrates a projection near the soma found only in *D. yakuba* (**d**, orange region 6) and the posterior projection in the SEZ found only in *D. melanogaster* (**e**, magenta region 7). **g, h**, Quantification of arbor compartments for *D. melanogaster* (circles, left) and *D. yakuba* (squares, right). Colours and numbers in (**g**) and (**h**) correspond to numbers and coloured regions shown in (**c-e**) and (**f**), respectively. Scale bars represent 50  $\mu\text{m}$ . *P* values measured via two-tailed t-tests for each arbor compartment. \*\*\*,  $p < 0.001$ ; \*\*,  $p < 0.01$ ; \*,  $p < 0.05$ .

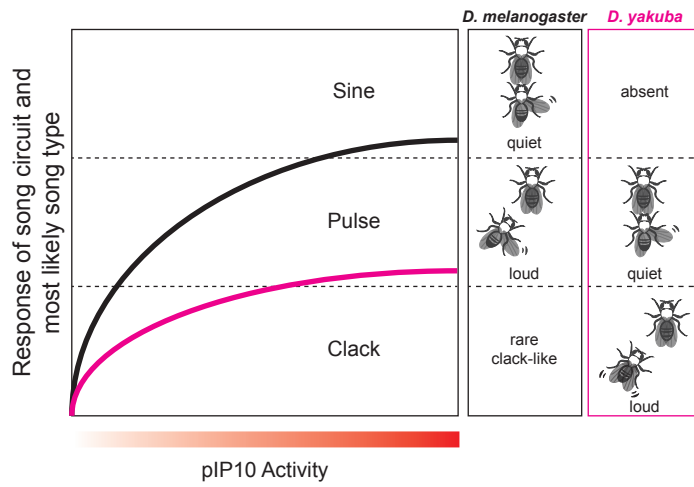

**Figure 5: Evolving functional roles of pIP10 are associated with behavioral context, rather than specific song types.**

Increasing pIP10 activity drives a different distribution of songs in *D. melanogaster* and *D. yakuba*. In both species, low pIP10 activation drives loud songs and higher activation levels drive quiet songs. Very low levels of pIP10 activity can drive clack-like song in *D. melanogaster*, illustrating that this song type was likely present in the common ancestor, although abundant clack song is evolutionarily derived in *D. yakuba*. Evolution of alternative song types resulted mainly from changes in the song circuitry downstream of pIP10 activity.

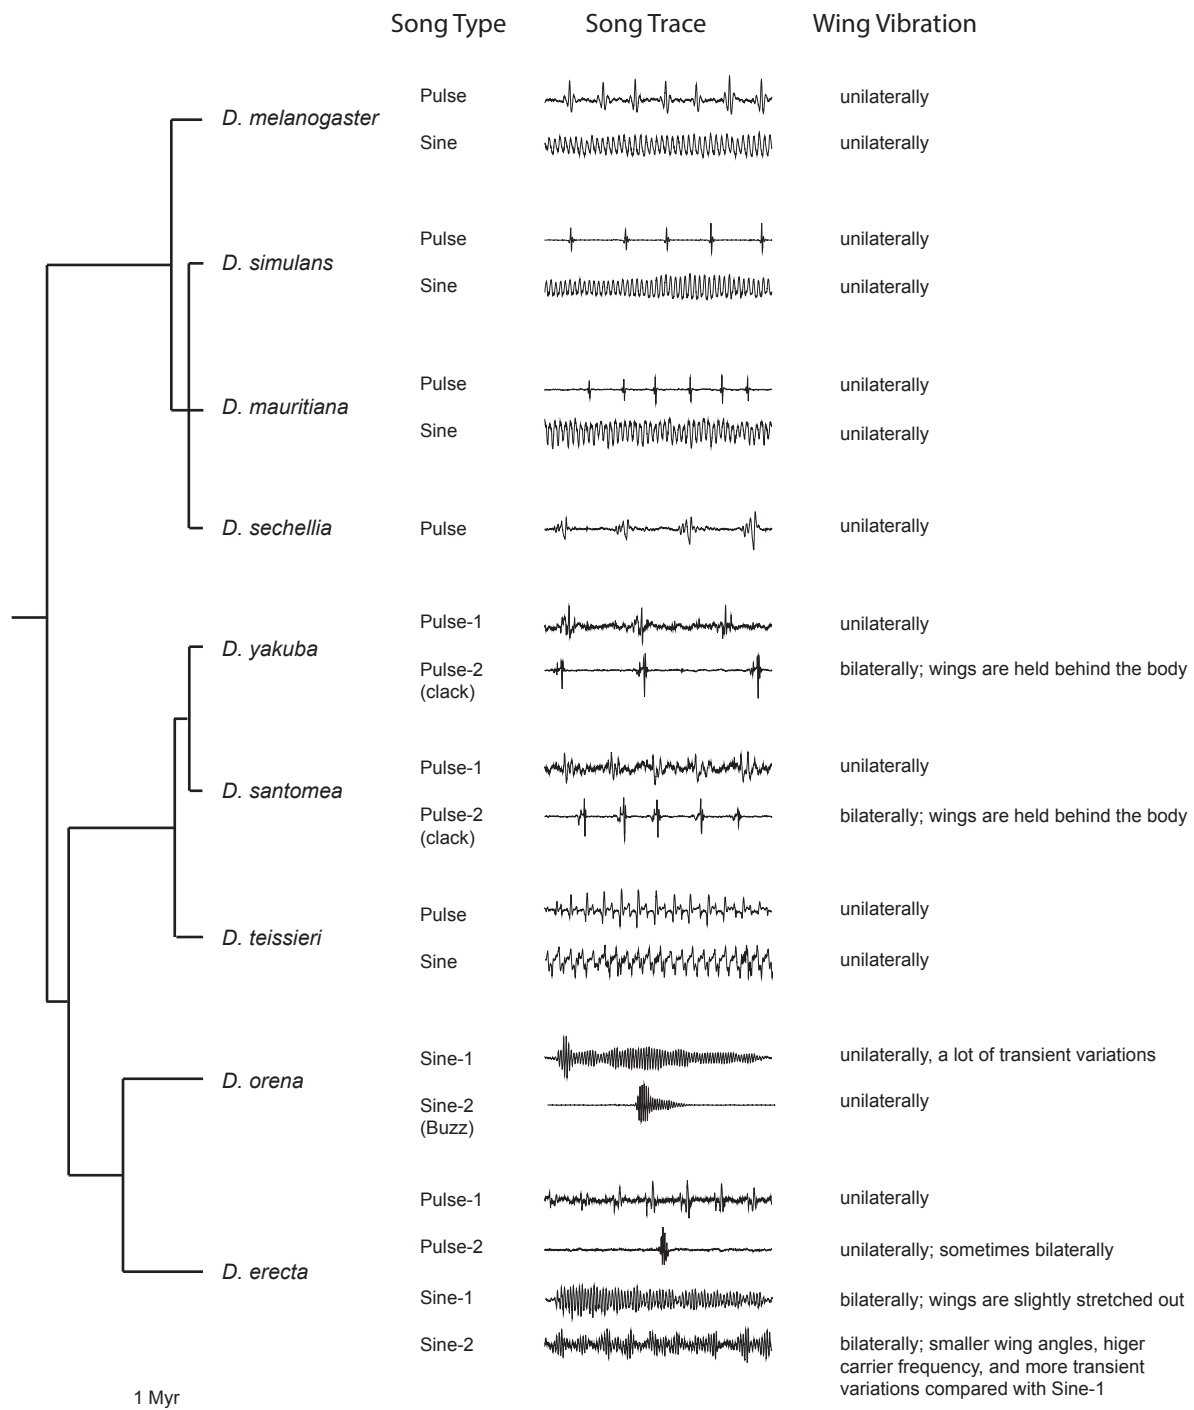

### Extended Data Figure 1: Summary of primary male courtship song types in the *D. melanogaster* species subgroup.

For each type of courtship song, a 250 ms song trace is shown and the relevant wing motion is briefly described on the right. In general, pulse song is defined as song consisting of pulse events separated by a relatively constant interval, and sine song is defined as continuous humming. Previous work reported that *D. orena* males produce pulse song consisting of polycyclic pulses<sup>12</sup>. We saw similar events occasionally but the interval and the number of “pulse” cycles vary a lot within a song train, we therefore categorized these events into Sine-1, which exhibits a lot of transient variations. The inconsistency could be due to a difference either in definition or the particular strain used. *D. erecta* Pulse-2 events are not always organized into trains. SI Movie 1 illustrates each song type.

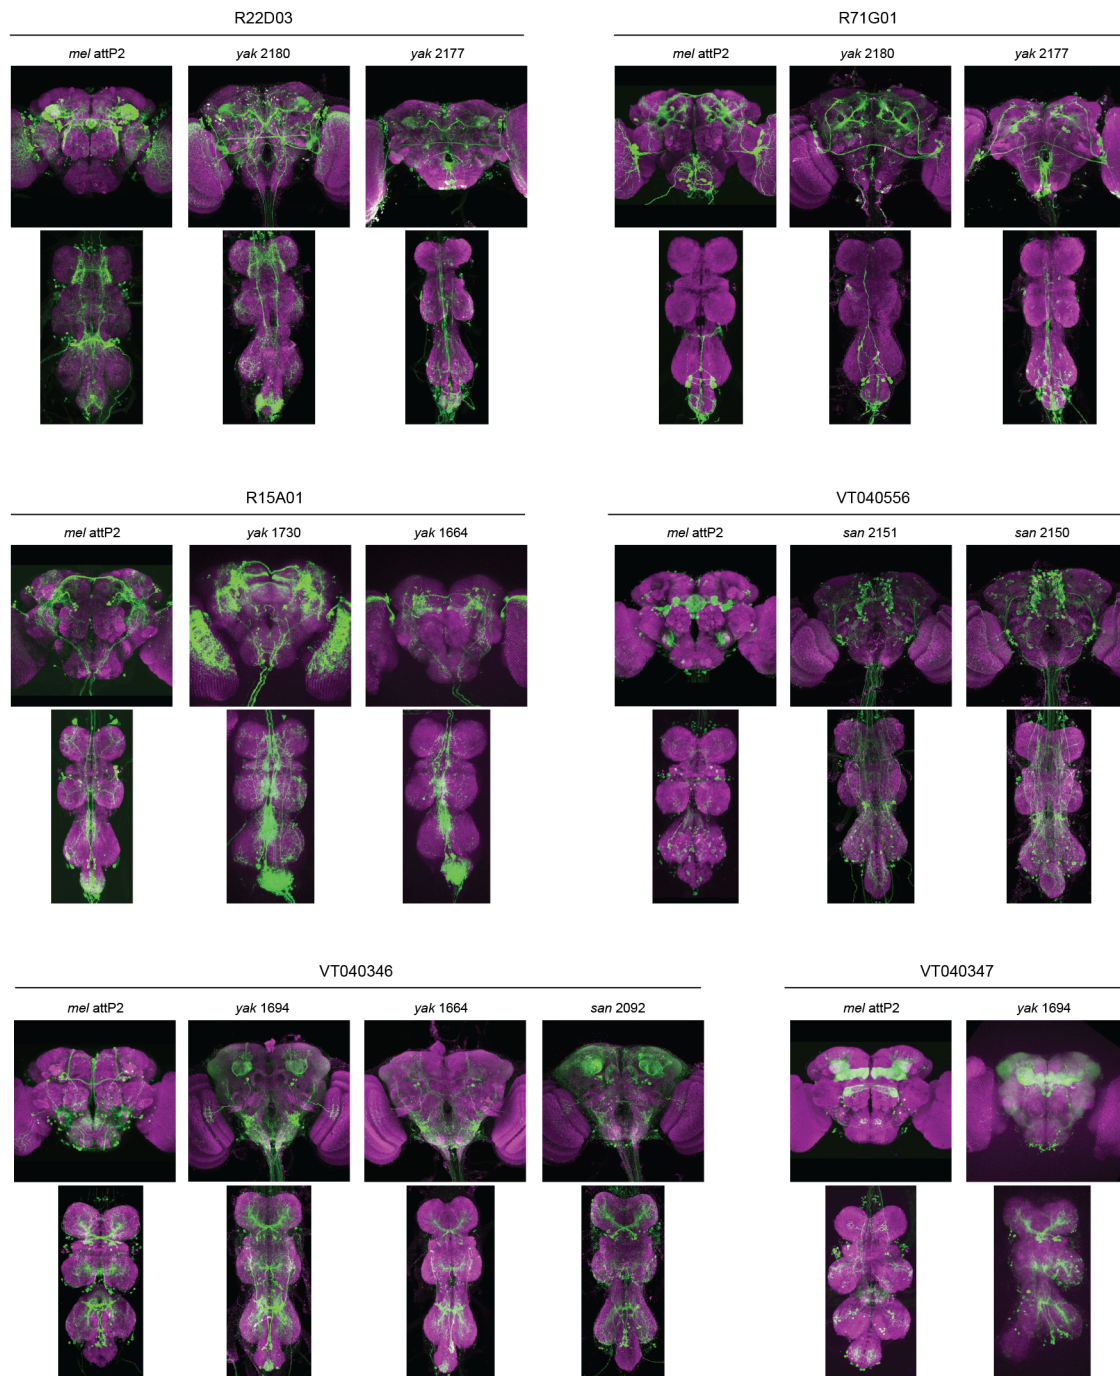

### Extended Data Figure 2: GAL4 reagents for P1 and pIP10 neurons.

Expression of GAL4 driven reporter gene (GFP or tdTomato) were visualized by staining the brains and VNSs of adult males using the corresponding antibody (green) and nc82 (magenta). The GAL4 ID, the species (*mel*, *D. melanogaster*; *yak*, *D. yakuba*; and *san*, *D. santomea*), and the attP site into which it was stably integrated are indicated.

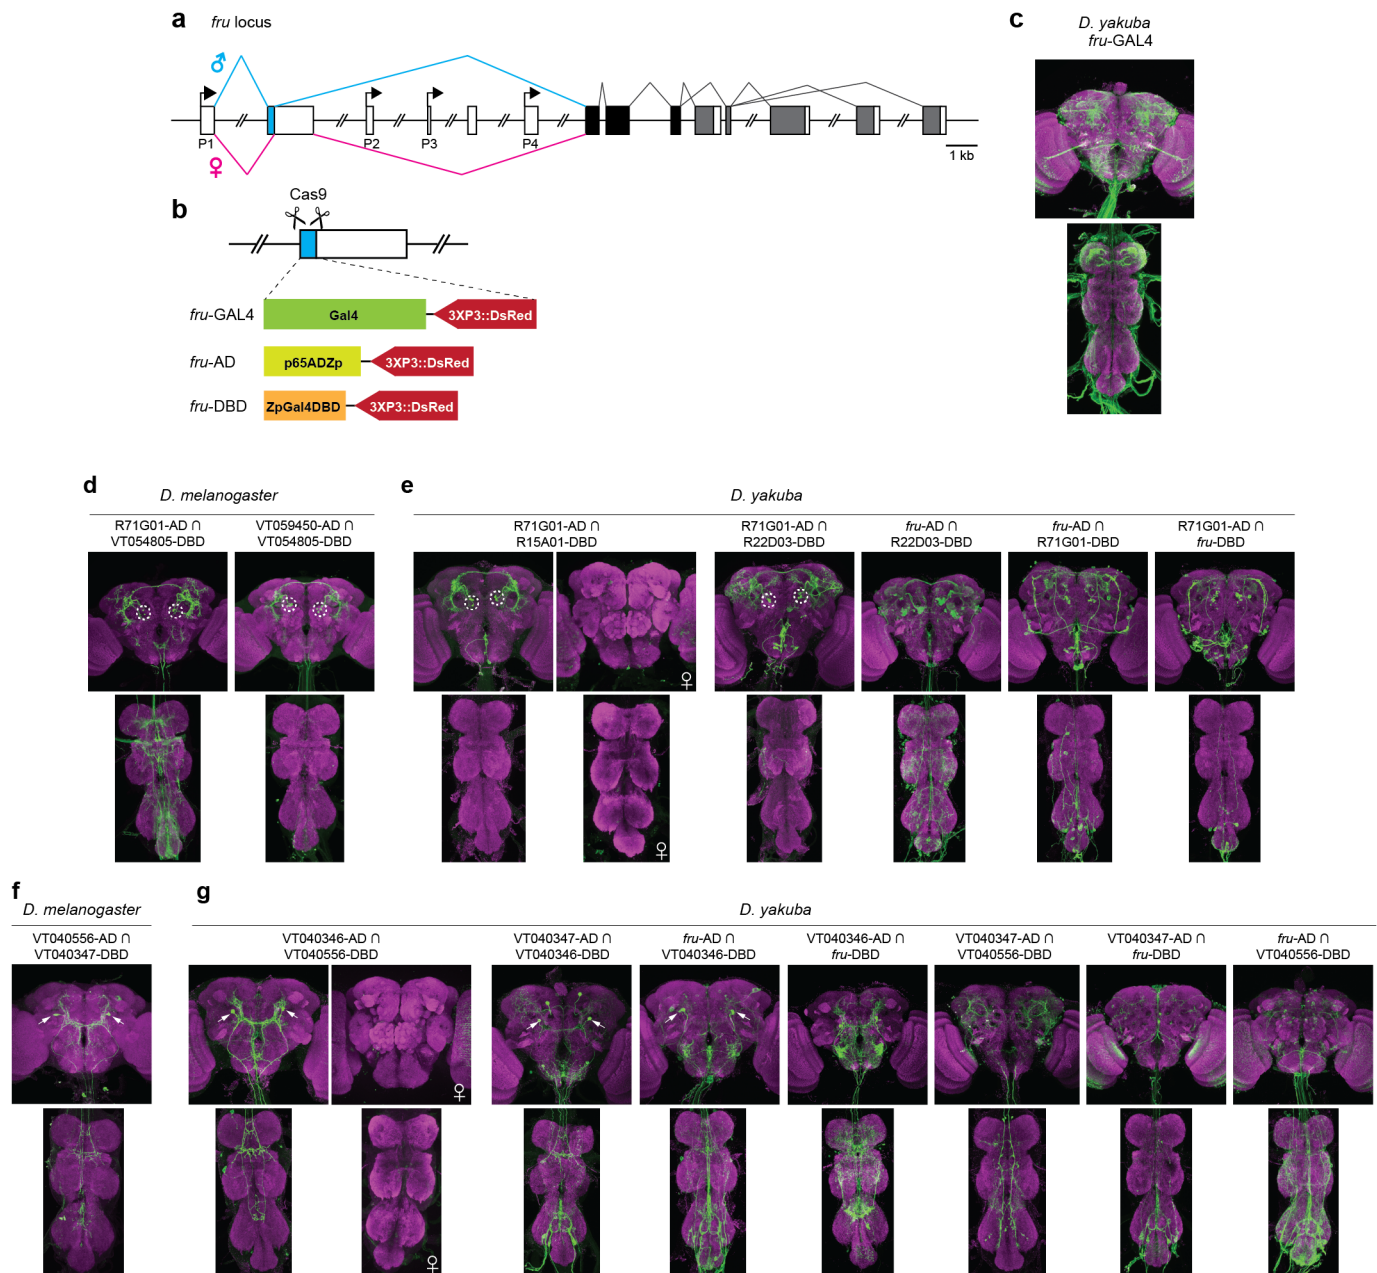

### Extended Data Figure 3: Split-GAL4 reagents of P1 and pIP10 neurons.

**a**, Schematic of *fru* gene structure. P1-P4 indicate alternative transcriptional start sites. Each box represents an exon. Open box indicates untranslated region and filled box area indicates protein coding region: cyan, male-specific coding exon; black: coding region of common exons; and grey: coding region of alternatively spliced exons. **b**, Generation of *fru* knock-in reagents via CRISPR-mediated HDR in *D. yakuba*. The male-specific exon (cyan) was replaced by GAL4, AD, and DBD, respectively. **c-g**, Immunostaining of brains and VNSs of adult flies for *D. yakuba fru-GAL4* (**c**), P1 split-GAL4 lines (**d, e**), and pIP10 split-GAL4 lines (**f, g**). Male brains and VNSs are shown unless indicated. Expression of split-GAL4 driven reporter gene (GFP or tdTomato) were visualized by staining using the corresponding antibody (green) and nc82 (magenta). For split-GAL4 lines used in behavioral analysis, the cell bodies of the labelled neurons are marked with a dashed circle for P1 and an arrow for pIP10.

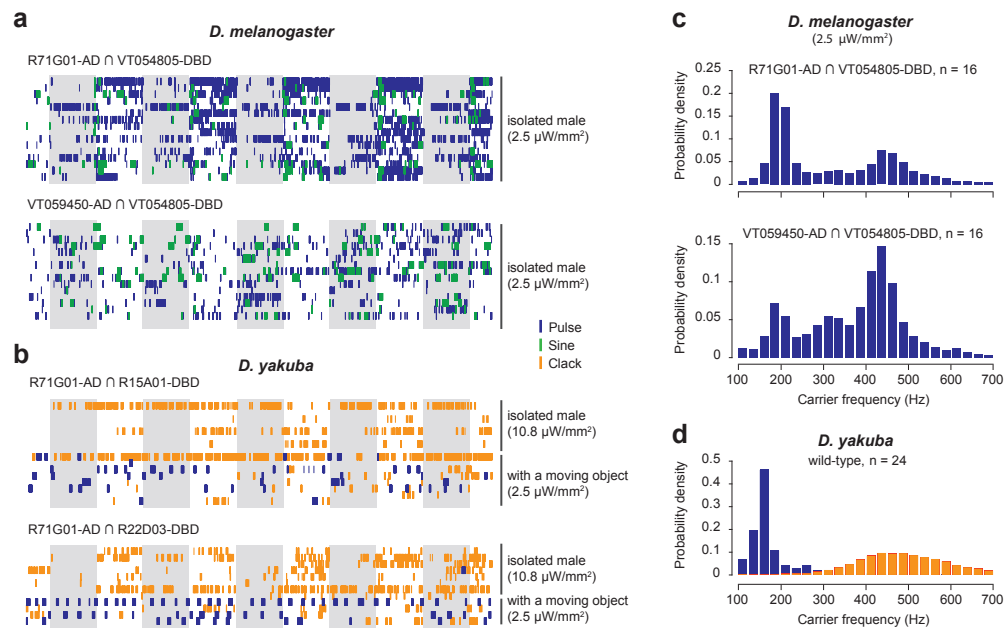

#### Extended Data Figure 4: Song phenotypes resulting from P1 CsChrimson activation.

**a, b**, Raster plot of song events induced by 635 nm red light illumination of *D. melanogaster* (**a**) and *D. yakuba* (**b**) males expressing CsChrimson in P1 neurons. Blue: pulse song; green: sine song; and orange: clack song. Each row represents song of one fly. Each grey bar represents a 30 s light stimulation trial. The trials shown here are part of an activation experiment using ramping irradiations and the trials at the irradiance level that gives relatively robust activation are shown, so song events that occur before the first stimulation shown here were induced by earlier stimulations that are not shown. *D. melanogaster* songs were analyzed with FlySong-Segmenter to identify pulse and sine events. *D. yakuba* songs were annotated manually to identify pulse, clack, and sine events, as the large amount of wing scissoring and abdomen quivering behaviors elicited by CsChrimson activation generated sound that confounded automatic song annotation. In *D. yakuba*, activation was performed on isolated males as well as in the presence of a moving object (a male). Repeating these experiments without red light illumination generated no (isolated male) or very little (with a moving object) song (data not shown). The activation phenotype of R71G01-AD  $\cap$  R15A01-DBD is less robust than R71G01-AD  $\cap$  R22D03-DBD, presumably because it labels only a small subset of P1 neurons (n=3 per hemisphere). **c**, The distribution of pulse carrier frequency in P1-activated *D. melanogaster* males using two split-GAL4 lines. **d**, The distribution of carrier frequency for pulse (blue) and clack (orange) song in wild-type *D. yakuba* males. Number of scored animals are indicated.

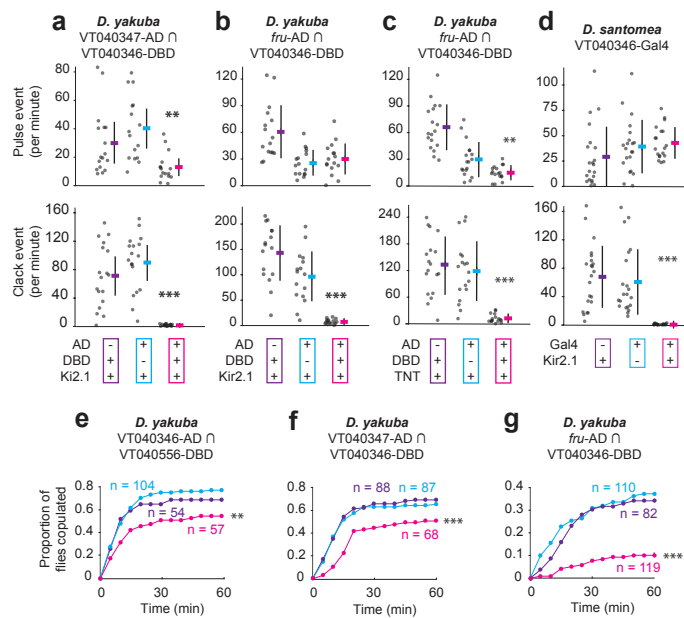

**Extended Data Figure 5: Song phenotypes and copulation rates resulting from pIP10 inactivation.** **a-d**, Pulse and clack song production of pIP10 silenced males in *D. yakuba* using different split-GAL4 drivers and effectors (**a-c**) and in *D. santomea* using a non-sparse GAL4 driver (**d**). Data for each animal and mean  $\pm$  SD are shown.  $n > 16$ . P values estimated with one-way ANOVA using a permutation test. **e-g**, Copulation success of pIP10 silenced males (pIP10 > TNT) in *D. yakuba*. The genotypes and their color representation are the same as in Fig. 2b and the panel **a** and **b**: AD control (purple), DBD control (cyan), and pIP10 silenced males (magenta). Sample size for each genotype is shown. P values measured via a logrank test. Significance is indicated only when the experiment group is significantly different from both control groups and the less significant result is shown. \*\*\*,  $p < 0.001$ ; \*\*,  $p < 0.01$ .

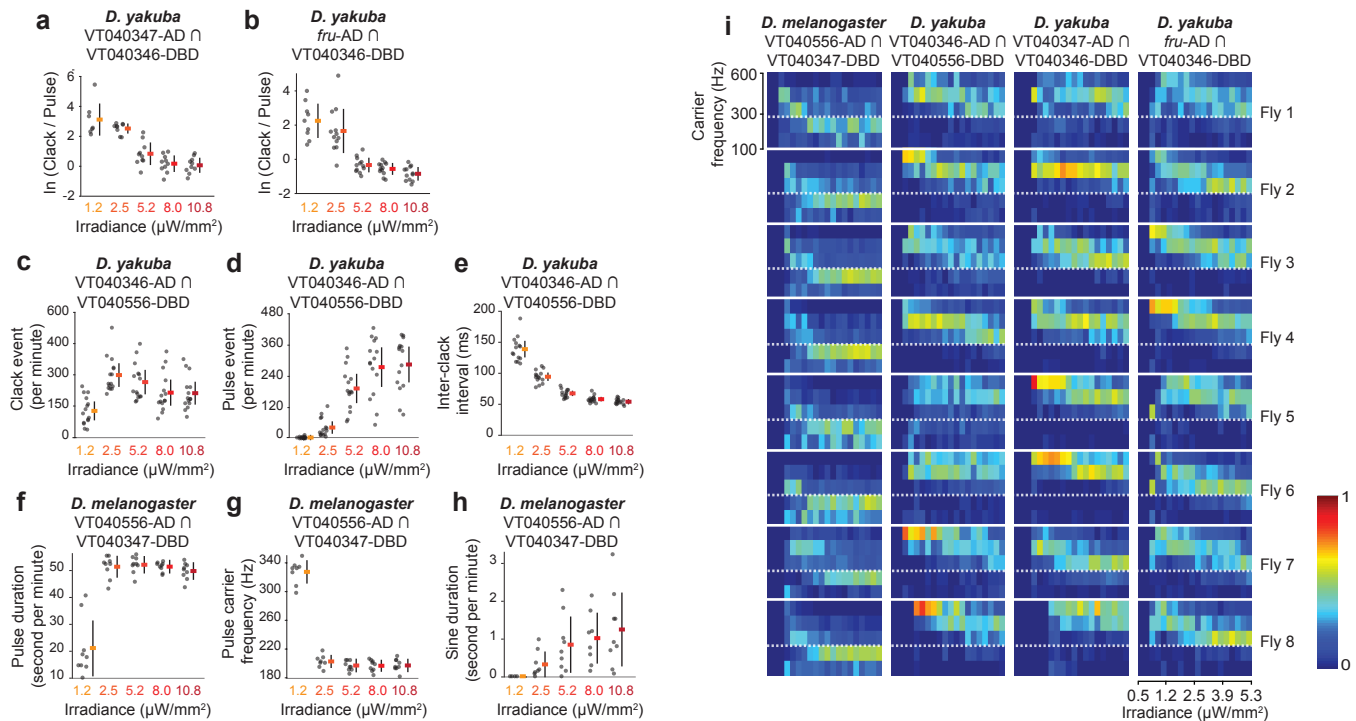

**Extended Data Figure 6: Additional song phenotypes resulting from pIP10 CsChrimson activation at different irradiances in *D. yakuba* and *D. melanogaster*.**

**a, b**, Natural log (ln) ratio of clack versus pulse events of pIP10 activated males in *D. yakuba* using the split-GAL4 lines VT040347-AD  $\cap$  VT040346-DBD (**a**) and fru-AD  $\cap$  VT040346-DBD (**b**). **c-e**, Song phenotypes of pIP10 activated males in *D. yakuba* using the cleanest pIP10 split-GAL4 driver (VT040346-AD  $\cap$  VT040556-DBD): number of clack events per minute of activation (**c**), number of pulse events per minute of activation (**d**), inter-clack interval (**e**). **f-h**, Song phenotypes of pIP10 activated males in *D. melanogaster*: pulse duration per minute of activation (**f**), pulse carrier frequency (**g**), and sine duration per minute of activation (**h**). Data for each animal tested and mean  $\pm$  SD are shown.  $n > 8$ . **i**, Heat map showing the distribution of song carrier frequency (pulse song for *D. melanogaster*; pulse and clack song combined for *D. yakuba*) of CsChrimson expressing pIP10 males with ramping irradiance using incremental steps of  $\sim 0.25 \mu\text{W}/\text{mm}^2$ . Color represents the relative density of song events within a given carrier frequency range at the tested irradiance. See Fig. 2. for the mean of all tested animals.



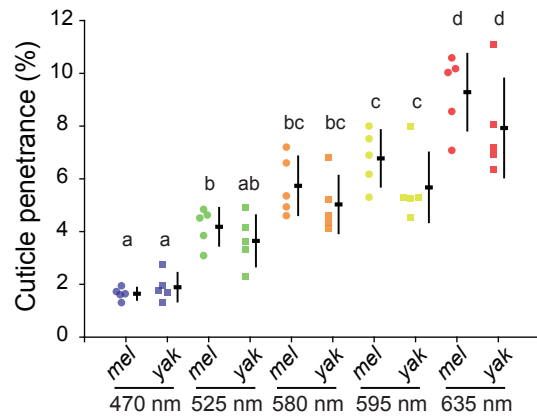

**Extended Data Figure 7: Penetrance of light through the cuticle in *D. melanogaster* (mel) and *D. yakuba* (yak) at different wavelengths.** Data are shown for each animal and mean  $\pm$  SD are plotted.  $n=5$ . Significance ( $p < 0.05$ ) tested within and across species at each wavelength via two-way ANOVA and post-hoc Holm-Sidak pairwise multiple comparisons test. Same letter denotes no significant difference.

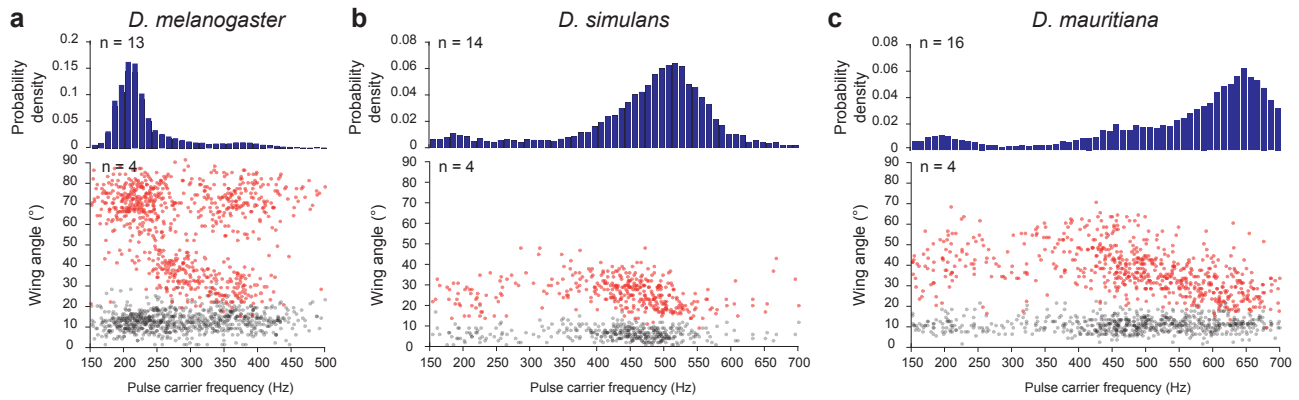

**Extended Data Figure 8: Carrier frequency and wing angle of pulse song in *D. melanogaster*, *D. simulans*, and *D. mauritiana*.**

**a-c**, Histograms of pulse carrier frequency from random samples of song (top plot) and wing angle versus pulse carrier frequency for selected songs (bottom plot) for *D. melanogaster* (**a**), *D. simulans* (**b**), and *D. mauritiana* (**c**). In the bottom plots, we oversampled pulses with less distributed carrier frequencies (see methods) to more fully characterize the association between wing angle and pulse carrier frequency. The angles of both wings were measured for each pulse event and the red and grey points show the angles of the more and less extended wings, respectively. Number of scored animals are indicated.
